# Supplementary material for: First total synthesis of versicotide A, B and C
Source: Royal Society of Chemistry journal article supplement (doi:10.1039/d0ra09635k), 2020-01-01
Supplement: d0ra09635k1.pdf [file d0ra09635k1.pdf]

## Supporting information

### Table of contents

|                                                                                                       |     |
|-------------------------------------------------------------------------------------------------------|-----|
| 1. General Experimental information.....                                                              | S2  |
| 2. Solid Phase Peptide Synthesis and Solution Phase Macrocyclization .....                            | S2  |
| 2.1. Resin loading.....                                                                               | S2  |
| 2.2. Removal of NHFmoc protecting group.....                                                          | S3  |
| 2.3. Coupling of subsequent N-Fmoc protected amino acids to free primary or<br>secondary amines ..... | S3  |
| 2.4. Coupling of subsequent N-Fmoc protected amino acids to Anthranilic acid .....                    | S4  |
| 2.5 Cleavage.....                                                                                     | S4  |
| 2.6 Solution phase macrocyclization.....                                                              | S4  |
| 3. Solution Phase Synthesis.....                                                                      | S5  |
| 3.1 Procedure for coupling reaction: method I.....                                                    | S5  |
| 3.2 Procedure for coupling reaction: method II.....                                                   | S6  |
| 4. Characterization Data of Products.....                                                             | S7  |
| 5. NMR Spectra, ESI-MS and chromatographic data.....                                                  | S9  |
| 6. X ray crystallographic data.....                                                                   | S36 |

## 1. General experimental information

All reactions were carried out under nitrogen atmosphere with dry, freshly distilled solvents, under anhydrous conditions, unless otherwise stated. All solvents were purified following procedures described in literature.<sup>1</sup>

All yields refer to chromatographically and spectroscopically (<sup>1</sup>H-NMR and <sup>13</sup>C-NMR) pure products.

NMR spectra were recorded with a Bruker Advance NEO-400, Bruker Avance III 500 MHz or Bruker Avance III 400 MHz equipment. All chemical shifts were related to TMS as internal reference.

All solid phase reactions were monitored by colorimetric test (Kaiser or Chloranil). 2-Chlorotriyl chloride resin (2-CTC, 100-200 mesh, 1.1 mEq/g) was acquired from CHEM-IMPEX INT'L INC.

HPLC analyses were carried out in a Shimadzu (LC-10AT Pump) HPLC equipped with an SPD20A prominence UV/Vis detector, Phenomenex Kinetex C18 (4.6x150mm, 5µm) column and H<sub>2</sub>O: CH<sub>3</sub>CN with 0.1 % formic acid. All mass spectra were acquired with a Shimadzu 8040 HPLC-MS-MS equipment, with LC-20AD pumps, a SIL-20A autosampler, electrospray ionization and triple quadrupole mass detector.

---

<sup>1</sup> Perrin, D. D. ; Armarego, W. L. F. "Purification of Laboratory Chemicals", 3<sup>th</sup> Ed. Pergamon Press, Oxford, 1988.

## 2. Solid Phase Peptide Synthesis and Solution Phase Macrocyclization

### 2.1. Resin loading

The 2-Chlorotrityl chloride resin (2-CTC) ((100-300 mesh, 1.20 mmol/g) were added to a syringe peptide synthesis vessel. The resin was swelled in  $\text{CH}_2\text{Cl}_2$  (3 x 5 min).

A solution of first protected amino acid Fmoc-AA-OH (1 eq. for 0.8 mmol/g loading) and DIPEA (3 eq.) in  $\text{CH}_2\text{Cl}_2$  was added and the resin was shaken 10 minutes. Then, an extra 7.0 eq. of DIPEA were added and shaking was continued for 50 min. MeOH (0.8 mL/ g of resin) was added to the previous mixture in order to cap unreacted functional groups on the resin, and shaken for 10 min. After filtering, the resin was washed with  $\text{CH}_2\text{Cl}_2$  (x3), MeOH (x3),  $\text{CH}_2\text{Cl}_2$  (x3), DMF (x3).

### 2.2. Removal of NHFmoc group

The resin was washed with DMF (x3) and Fmoc protecting group was removed by treating the resin with piperidine-DMF solution (1:4) for 1, 5 and 5 minutes successively. In exceptional cases deprotection step was accomplish by a single treatment with piperidine-DMF solution for 5 minutes, in order to prevent side reactions.

### 2.3 Coupling of subsequent N-Fmoc protected amino acids to primary or secondary amines

After removal of NHFmoc protecting group as previously described, the resin was washed with DMF (x3),  $\text{CH}_2\text{Cl}_2$  (x3) and DMF (x3). A solution of Fmoc-AA-OH (3 eq.) and DIPEA (6 eq.) in DMF was added to the resin, followed by a solution of HBTU, for coupling to primary amines, or HATU (2.9 eq.) in DMF, in case of coupling to an N methylated amino acid. The mixture was stirred for 60 min. After the coupling was completed, the resin was washed with DMF (x3) and  $\text{CH}_2\text{Cl}_2$  (x3). Deprotection and coupling cycles were repeated with the appropriate amino acids to provide the desired compound. Completion of the coupling was monitored by colorimetric assays; Kaiser test in case of primary amines and Chloranil test for secondary amines. Coupling procedure was repeated in case of positive results.

## 2.4 Coupling of subsequent N-Fmoc protected amino acids to Anthranilic acid

After removal of NHFmoc protecting group as previously described, the resin was washed with DMF (x3), CH<sub>2</sub>Cl<sub>2</sub> (x3) and DMF (x3). A solution of Fmoc-AA-OH (5 Eq.), Oxyma Pure (5 Eq.), and DIC (5 Eq.) was added to the vessel. The mixture was stirred for 60 min. Then, the resin was washed with DMF (x3) and CH<sub>2</sub>Cl<sub>2</sub> (x3).

## 2.5 Cleavage

Unless otherwise stated, the peptide was cleaved from the resin by treatment with 1% TFA in CH<sub>2</sub>Cl<sub>2</sub> for 2-3 minutes at room temperature followed by filtration and collection of the filtrate in MeOH. The treatment was repeated three times and then the resin washed with CH<sub>2</sub>Cl<sub>2</sub> (x5) and MeOH (x3). Solvents were removed *in vacuo* to obtain the crude peptide. LC-MS was used to identify the desired product.

## 2.6 General procedure for macrocyclization in solution phase.

### 2.6.1. Method I

Macrocyclization reaction of the corresponding linear peptide was performed in diluted conditions (1-5 mM) using HBTU or HATU (1.5 eq.), DIPEA (3 eq.), 4-DMAP (catalytic) in dried CH<sub>2</sub>Cl<sub>2</sub> at room temperature during 1-3 days. The reaction mixture was washed with HCl 5% and then with saturated aqueous NaHCO<sub>3</sub>, dried over MgSO<sub>4</sub>, filtered and concentrated *in vacuo*. The crude was purified by flash chromatography to obtain the pure macrocycle.

### 2.6.2. Method II

The trifluoroacetate salt of the corresponding linear peptide was dissolved in dried  $\text{CH}_2\text{Cl}_2$  and diluted to a concentration of 1-5 mM. DIPEA (1eq.) was added to enable dissolution. EDCI (1.2 eq) and oxyma (1.2 eq.) were added at  $0^\circ\text{C}$  and the reaction mixture was stirred for 10 minutes. Then, the reaction mixture is allowed to reach room temperature and stirred for 48 hours. The reaction mixture was washed with HCl 5% and then with saturated aqueous  $\text{NaHCO}_3$ , dried over  $\text{MgSO}_4$ , filtered and concentrated *in vacuo*. The crude was purified by flash chromatography to obtain the pure macrocycle.

## 3. Solution phase synthesis

### 3.1 General procedure for coupling reaction

#### 3.1.1. Method I

EDC.HCl (1.5 eq.), Cl-HOBt (1.5 eq.) and DIPEA (2.0 eq.) were added to a solution of Boc protected amino acid (Boc-AA-OH, 1.0 eq.) in DCM at  $0^\circ\text{C}$  under  $\text{N}_2$  atmosphere. N-terminus deprotected linear peptide or amino acid ester ( $\text{NH}_2\text{-AA-COOEt}$ ) was added and the reaction mixture was stirred at  $0^\circ\text{C}$  for 10 min and then at room temperature, overnight.

DCM was removed under vacuum and AcOEt was added. The organic phase was washed with 0.1 M HCl aqueous solution (30 mL  $\times$  2), brine (10 mL), saturated  $\text{NaHCO}_3$  solution (30 mL  $\times$  2) and brine (10 mL), dried over  $\text{MgSO}_4$  and filtered. The solvent was removed under vacuum to give the crude material. The crude material was purified by flash chromatography.

#### 3.1.2. Method II

Bis(trichloromethyl)carbonate (0.33 eq.) was added to a solution of Boc-Ala-OH (1 eq.) in dry THF under  $\text{N}_2$  atmosphere at  $0^\circ\text{C}$ . 2,4,6-colidine (2.6 eq.) were added to the solution and a white suspension was formed. The reaction mixture was stirred for 5 minutes and the suspension was added to a solution of N-terminus deprotected linear peptide or amino acid

ester ( $\text{NH}_2\text{-AA-COOEt}$ ) (1 eq.) in dry THF, followed by DIPEA (1 eq.). The reaction mixture was stirred overnight and concentrated under vacuum. 30 mL of AcOEt were added and the organic phase was washed with HCl 5% (3 x 5mL), brine (3 x 5mL) and  $\text{NaHCO}_3$  (3 x 5mL), dried with  $\text{Na}_2\text{SO}_4$ , filtered and concentrated. The crude material was purified by flash chromatography.

### 3.2. Ester hydrolysis

1 eq. of the ester was dissolved in THF and 3 eq. of de LiOH dissolved in water. The reaction was stirred for two hours at room temperature. THF was removed under vacuum. HCl 5% was added to the remaining solution to a pH of 3. The solution was extracted with AcOEt. The organic layers were dried with  $\text{Na}_2\text{SO}_4$ , filtered, and the solvent removed under vacuum.

### 3.3. Boc deprotection procedure

A threefold excess of a solution of 1.8M HCl in dioxane was added to the Boc-aminoacid. The solution was stirred at room temperature for an hour and the solvent removed under vacuum. The obtained hydrochloride derivative was used in the next step without further purification.

### 3. Characterization Data of Products

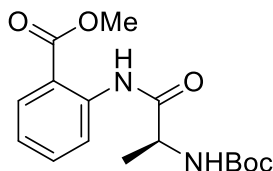

5

Compound **5** was prepared by solution phase synthesis, either by coupling method I or II.

For **method I**. Boc protected alanine (Boc-Ala-OH, 378.4 mg, 2 mmol) was added to a solution of Cl-HOBt (508.7 mg, 3 mmol) and NMM (220  $\mu$ L, 2 mmol) in 3 mL DCM at 0°C under N<sub>2</sub> atmosphere. The resulting mixture was stirred at 0°C for 10 min and then methyl anthranilate (NH<sub>2</sub>-Anth-OMe, 906 mg, 6.0 mmol and EDC.HCl (575 mg, 3.0 mmol) were added in one portion. The reaction mixture was allowed to warm to room temperature and was stirred at room temperature overnight. The reaction mixture was diluted with 30 mL of DCM, and the organic phase was washed with 0.2 M HCl (3x15 mL), brine (10 mL), and saturated NaHCO<sub>3</sub> solution, dried over Na<sub>2</sub>SO<sub>4</sub> and filtered.

The solvent was removed under vacuum and the crude material was further purified by flash chromatography (AcOEt:hexane, 1:4) to give pure Boc-Ala-Anth-OMe (270.7 mg, 0.84 mmol) in 42% yield.

#### Method II

Bis(trichloromethyl)carbonate (74 mg, 0.25 mmol) was added to a solution of Boc-Ala-OH (140.0 mg, 0.74 mmol) in dry THF (2.5 mL) under N<sub>2</sub> atmosphere at 0°C. 2,4,6-collidine (250  $\mu$ L, 1.86 mmoles) were added to the solution. The reaction mixture was stirred for 5 minutes and the suspension was added to a solution of methyl anthranilate (85  $\mu$ L, 0.62 mmol) in 2 mL dry THF, followed by DIPEA (128  $\mu$ L, 0.74 mmol). The reaction mixture was stirred overnight and concentrated under vacuum. 30 mL of AcOEt were added and the organic phase was washed with HCL 5% (3 x 5mL), brine (3 x 5mL) and NaHCO<sub>3</sub> (3 x 5mL),

dried with Na<sub>2</sub>SO<sub>4</sub>, filtered and concentrated. The crude material was purified by flash chromatography (AcOEt:EP, 1:4) to give pure Boc-Ala-Anth-OMe, 51% yield (122 mg, 0.38 mmol).

**BocNH-Ala-Anth-OMe(5).** White solid. R<sub>f</sub>=0.43 (AcOEt: EP, 1:4). <sup>1</sup>H-NMR (400 MHz, CDCl<sub>3</sub>) δ 1.34–1.74 (m, 12 H), 3.92 (s, 3H), 4.40 (s, 1 H), 5.15 (s, 1 H), 7.10 (t, *J*=7.6 Hz, 1H), 7.56 (t, *J*=7.4 Hz, 1 H), 8.04 (dd, *J*=8.0, 1.3 Hz, 1H), 8.76 (d, *J*=8.4 Hz, 1 H), 11.57 (s, 1H). <sup>13</sup>C-NMR (101 MHz, CDCl<sub>3</sub>) δ 13.8, 14.0, 28.3, 52.3, 55.5, 57.6, 80.6, 115.2, 120.1, 122.6, 130.8, 134.6, 141.2, 168.3, 171.1.

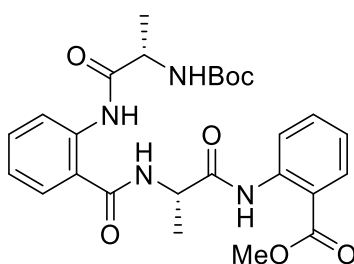

**6**

**Coupling method I** was applied to a solution of BocNH-Ala-Anth-OH (130 mg, 0.42 mmol, 1 eq) and NH<sub>2</sub>-Ala-Anth-OMe (100 mg, 0.42mmol, 1 eq). After the extraction, the crude material was purified by flash chromatography with EP: AcOEt (3:2) as mobile phase to obtain **6** in 10 % yield (22 mg 0.042 mmol).

**BocNH-Ala-Anth-Ala-Anth-OMe (6).** Colourless oil. R<sub>f</sub>=0.7 (AcOEt:EP, 3:2). <sup>1</sup>H-RMN (400 MHz, CDCl<sub>3</sub>) δ 1.47 (m, 12 H), 1.66 (d, *J*=7.1 Hz, 3H), 3.91 (s, 3 H), 4.28 – 4.44 (m, 1 H), 4.85 (d, *J*=7.0 Hz, 1 H), 5.10 – 5.27 (m, 1H), 7.10- 7.18 (m, 3 H), 7.50 (d, *J*=7.6 Hz, 1 H), 7.55 – 7.62 (m, 1H), 7.71 (dd, *J*=7.9, 1.3 Hz, 1 H), 8.06 (dd, *J*=8.0 Hz, 1.5, 1 H), 8.62 (d, *J*=8.4 Hz, 1 H), 8.70 (d, *J*=8.4 Hz, 1 H), 11.45 (s, 1H), 11.59 (s, 1H).

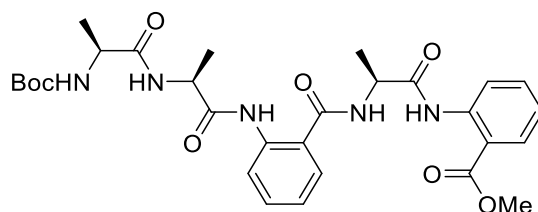



Boc protecting group of **6** was removed following general procedure. The resulting amine (20 mg, 0.042 mmol) was dissolved in 2.5 mL DCM under N<sub>2</sub> atmosphere and DIPEA (10.8 mg, 0.084 mmol) were added. The reaction mixture was put into a 0° ice bath and Boc-Ala-OH (10 mg, 0.05), HBTU (20 mg, 0.05 mmol) and DMAP (cat) were added. The reaction mixture was stirred at 0°C for 10 min and then at room temperature, overnight. DCM was removed under vacuum and AcOEt was added. The organic phase was washed with 0.1 M HCl aqueous solution (30 mL × 2), brine (10 mL), saturated NaHCO<sub>3</sub> solution (30 mL × 2) and brine (10 mL), dried over MgSO<sub>4</sub> and filtered. The solvent was removed under vacuum to give the crude material. The crude material was purified by flash chromatography with AcOEt:EP (4:1) to give 23 mg (0.039 mmol) of **5** (92% yield).

**BocNH-Ala-Ala-Anth-Ala-Anth-OMe (7)**. Yellow oil. R<sub>f</sub>= 0.46 (AcOEt:EP, 4:1). <sup>1</sup>H-NMR (400 MHz, CDCl<sub>3</sub>) δ 1.42 (d, *J* = 7.0 Hz, 3H), 1.45 (s, 9H), 1.50 (d, *J* = 7.1 Hz, 3H), 1.65 (d, *J* = 7.1 Hz, 3 H), 3.92 (s, 3 H), 4.21- 4.39 (m, 1 H), 4.56 - 4.65 (m, 1 H), 4.77- 4.88 (m, 1 H), 5.04- 5.17 (m, 1 H), 6.94 (s, 1 H), 7.05 – 7.21 (m, 3 H), 7.45 – 7.65 (m, 2 H), 7.71 (dd, *J*=7.9, 1.3 Hz, 1H), 8.06 (dd, *J*=8.0, 1.5 Hz, 1 H), 8.62 (d, *J*=8.4 Hz, 1 H), 8.70 (d, *J*=8.4 Hz, 1 H), 11.53 (s, 1H), 11.57 (s, 1H).

## NMR Spectra and ESI-MS data of Compounds

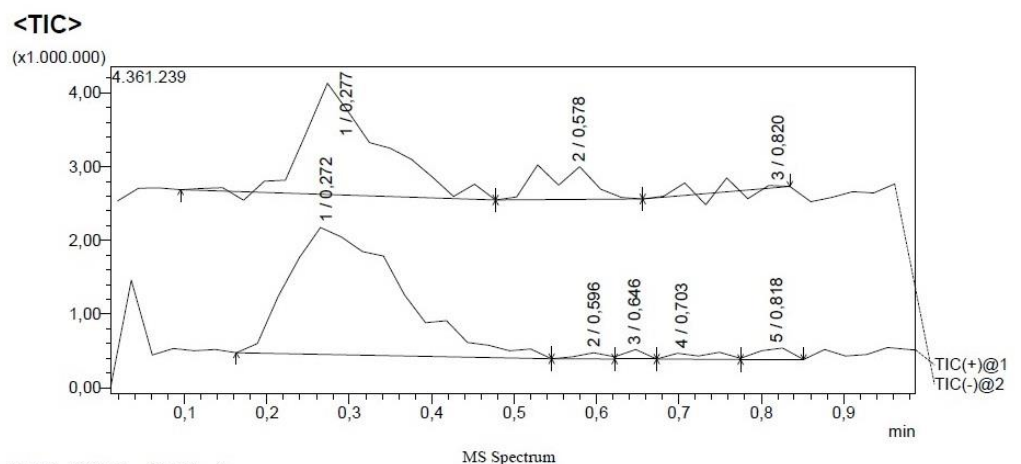

MS Spectrum

Line#:1 R.Time:----(Scan#:----)

MassPeaks:15

Spectrum Mode:Averaged 0.240-0.342(19-27) Base Peak:498(400833)

BG Mode:Averaged 0.010-0.138(1-11) Segment 1 - Event 1

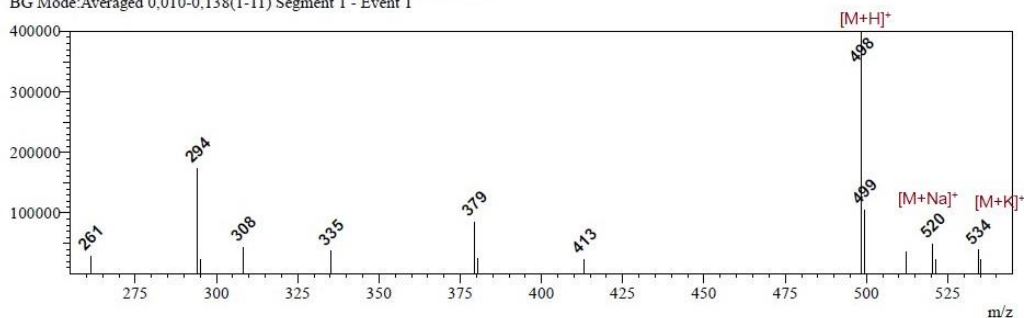

ESPECTRO MS+

Line#:1 R.Time:----(Scan#:----)

MassPeaks:15

Spectrum Mode:Averaged 0.240-0.342(19-27) Base Peak:498(400833)

BG Mode:Averaged 0.010-0.138(1-11) Segment 1 - Event 1

| #  | m/z    | Absolute Intensity | Relative Intensity |
|----|--------|--------------------|--------------------|
| 1  | 261.20 | 28427              | 7.09               |
| 2  | 294.20 | 173194             | 43.21              |
| 3  | 295.15 | 23281              | 5.81               |
| 4  | 308.30 | 43414              | 10.83              |
| 5  | 335.20 | 37146              | 9.27               |
| 6  | 379.30 | 85045              | 21.22              |
| 7  | 380.40 | 24759              | 6.18               |
| 8  | 413.15 | 23853              | 5.95               |
| 9  | 498.40 | 400833             | 100.00             |
| 10 | 499.30 | 105640             | 26.36              |
| 11 | 512.30 | 36212              | 9.03               |
| 12 | 520.30 | 48888              | 12.20              |
| 13 | 521.40 | 23979              | 5.98               |
| 14 | 534.30 | 39006              | 9.73               |

Fig. S1: ESI-MS of NHMeAla-Anth-NMeAla-Anth Ala-OH (Linear precursor of Versicotide A, 10)

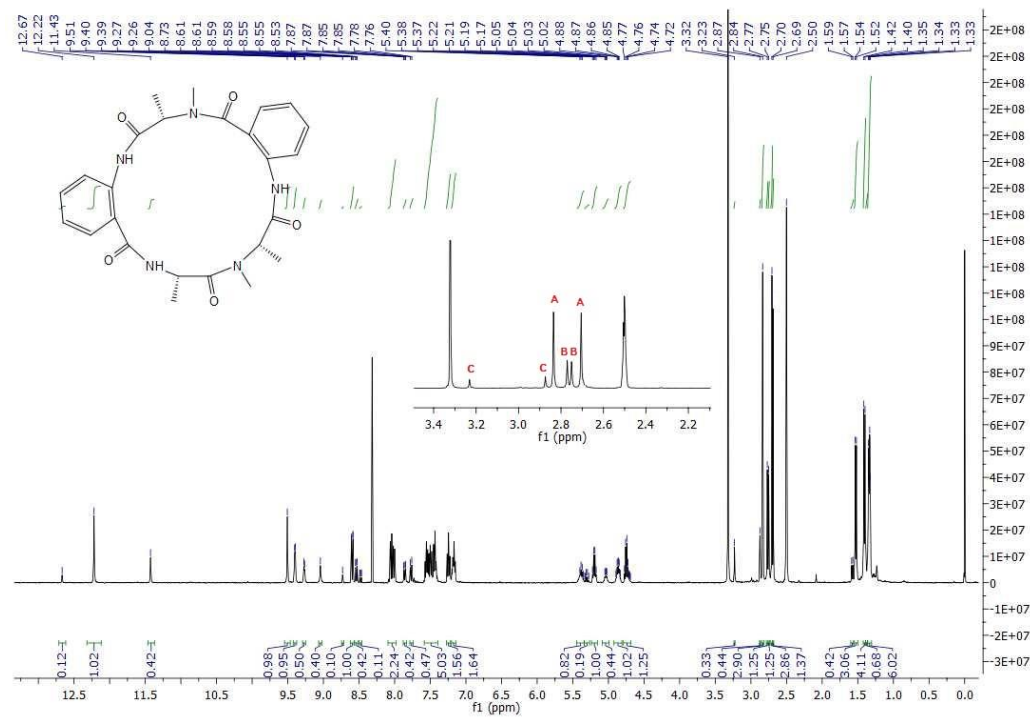

Fig. S2: <sup>1</sup>H-NMR in DMSO-d<sub>6</sub> of *Cyclo*-[Ala-Anth-NMeAla-Anth-NMeAla] (1) (Versicotide A) with area between 2.2 and 3.4 ppm zoomed to show conformers A, B and C.

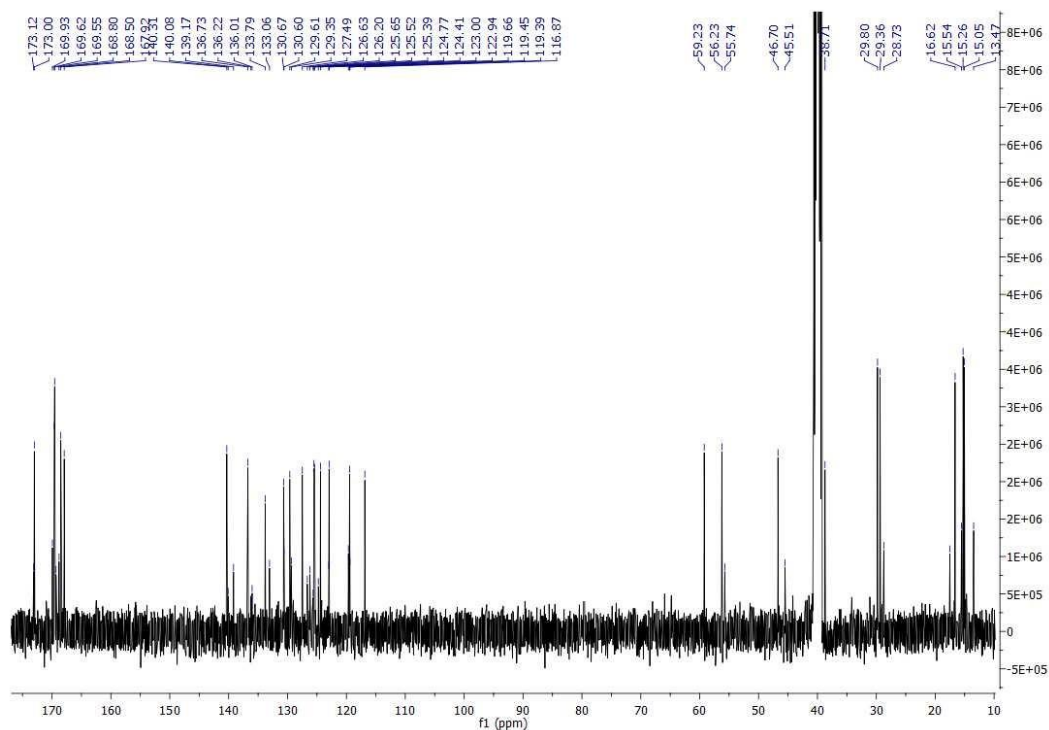

Fig. S3:  $^{13}\text{C}$ -NMR in DMSO-d6 of *Cyclo*-[Ala-Anth-NMeAla-Anth-NMeAla] (1) (Versicotide A)

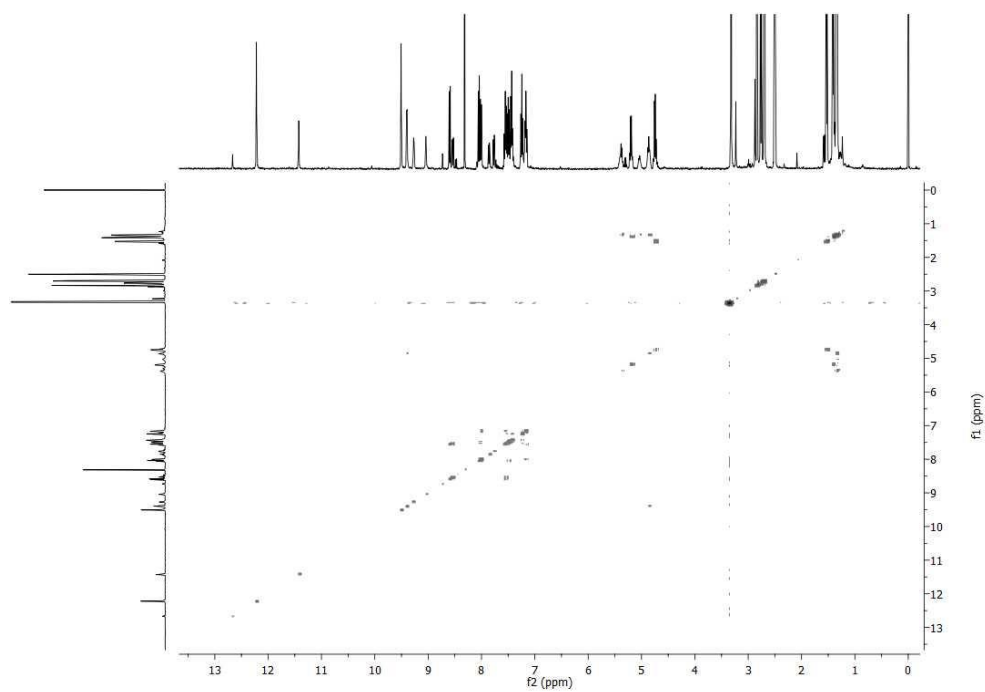

Fig. S4: COSY in DMSO-d6 of *Cyclo*-[Ala-Anth-NMeAla-Anth-NMeAla] (1)

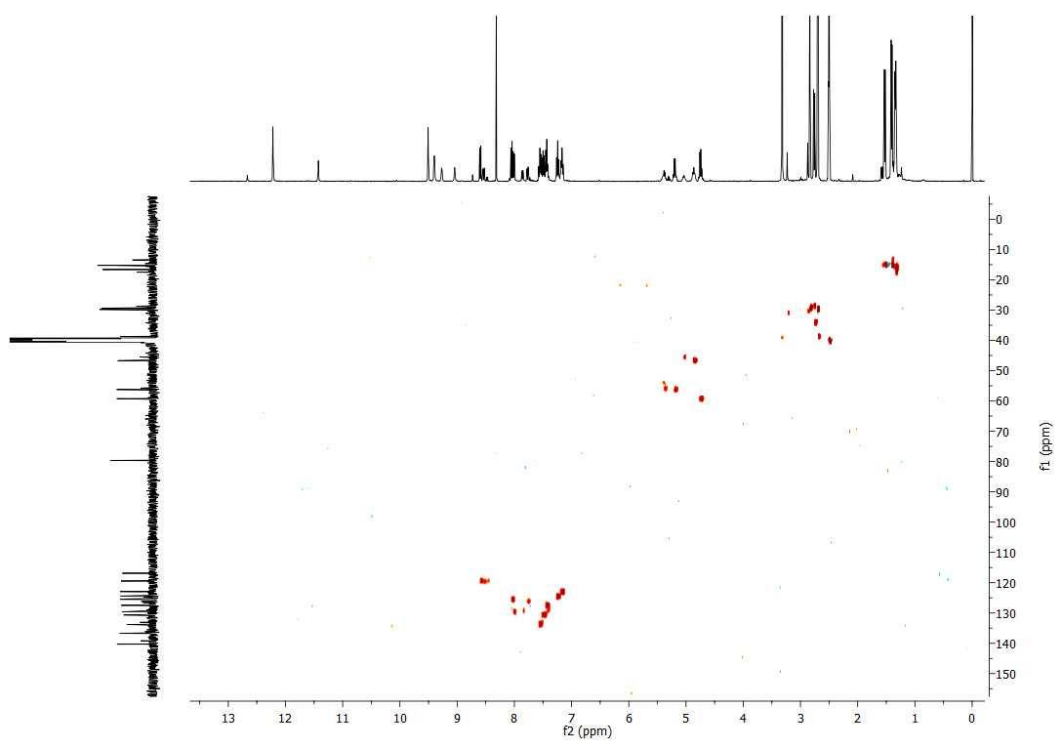

Fig. S5: HSQC in DMSO-d6 of *Cyclo*-[Ala-Anth-NMeAla-Anth-NMeAla] (1)

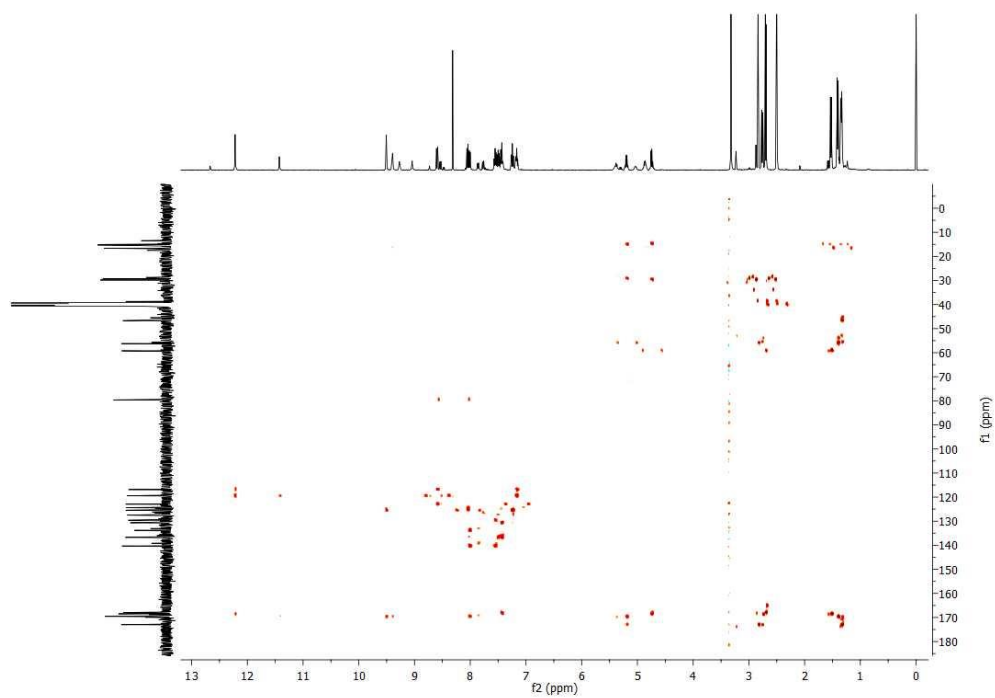

Fig. S6: HMBC in DMSO-d<sub>6</sub> of *Cyclo*-[Ala-Anth-NMeAla-Anth-NMeAla] (1)

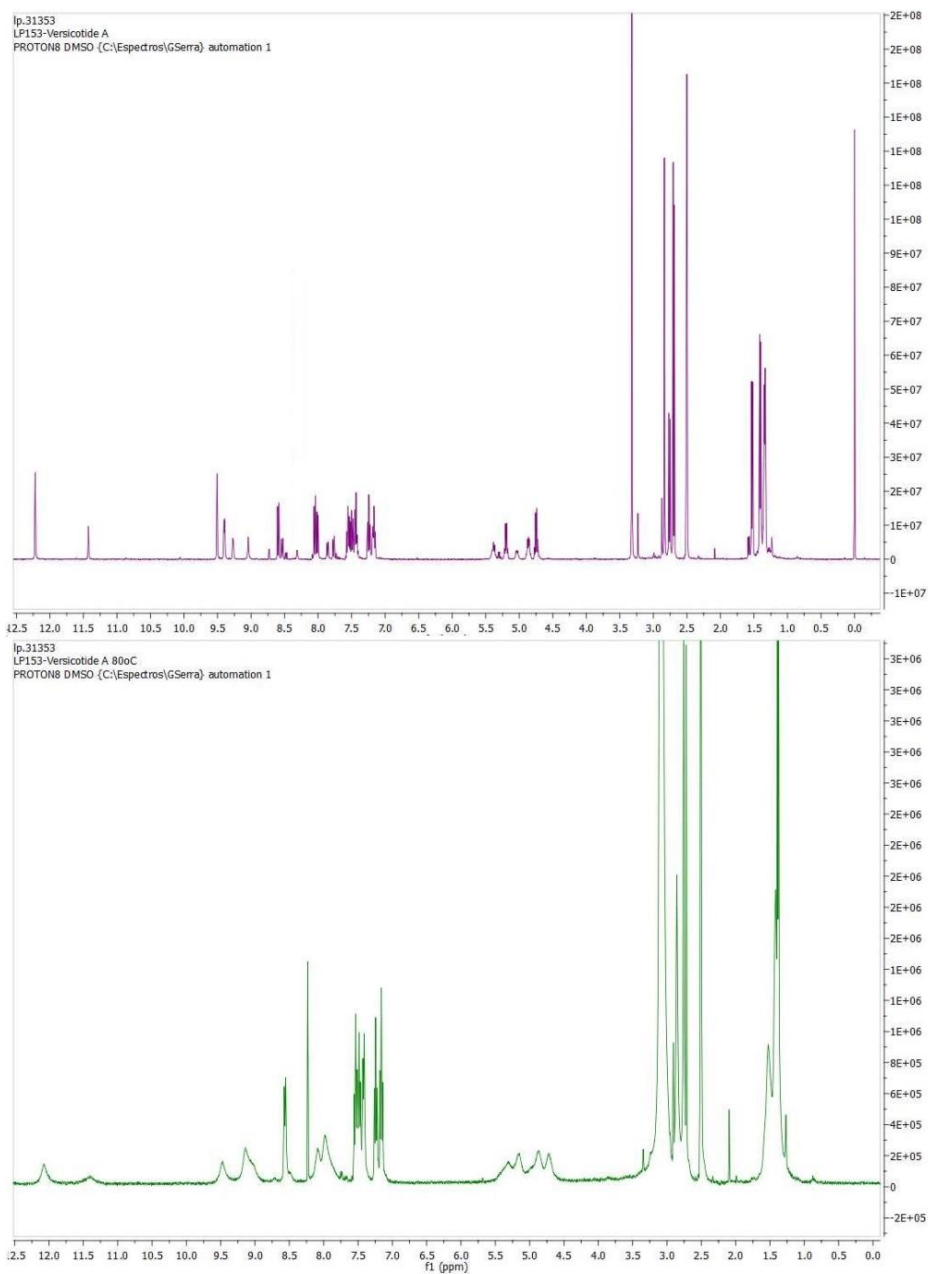

Fig S7: Comparison of <sup>1</sup>H-NMR at 40°C (top) and 80°C (bottom)

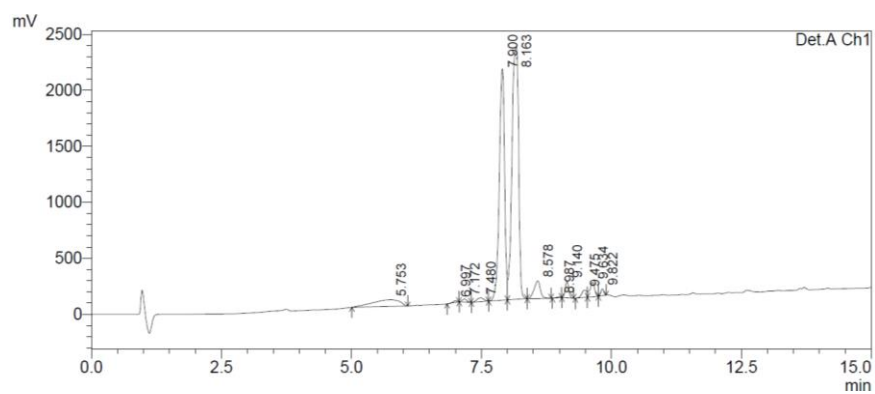

Detector A Ch1 225nm

| Peak# | Ret. Time | Area     | Height  | Area %  | Height % |
|-------|-----------|----------|---------|---------|----------|
| 1     | 5.753     | 2175015  | 59906   | 5.338   | 1.193    |
| 2     | 6.997     | 85636    | 14091   | 0.210   | 0.281    |
| 3     | 7.172     | 159693   | 27192   | 0.392   | 0.541    |
| 4     | 7.480     | 311367   | 33075   | 0.764   | 0.658    |
| 5     | 7.900     | 14493866 | 2064533 | 35.570  | 41.100   |
| 6     | 8.163     | 19957971 | 2256177 | 48.980  | 44.915   |
| 7     | 8.578     | 1308882  | 158299  | 3.212   | 3.151    |
| 8     | 8.987     | 42885    | 9004    | 0.105   | 0.179    |
| 9     | 9.140     | 697338   | 145837  | 1.711   | 2.903    |
| 10    | 9.475     | 466984   | 66476   | 1.146   | 1.323    |
| 11    | 9.634     | 805925   | 128845  | 1.978   | 2.565    |
| 12    | 9.822     | 241792   | 59736   | 0.593   | 1.189    |
| Total |           | 40747354 | 5023172 | 100.000 | 100.000  |

Fig. S8: HPLC Chromatogram of 1: *Cyclo*-[NHMeAla-Anth-NMeAla-Anth Ala-OH] (Versicotide  
A)

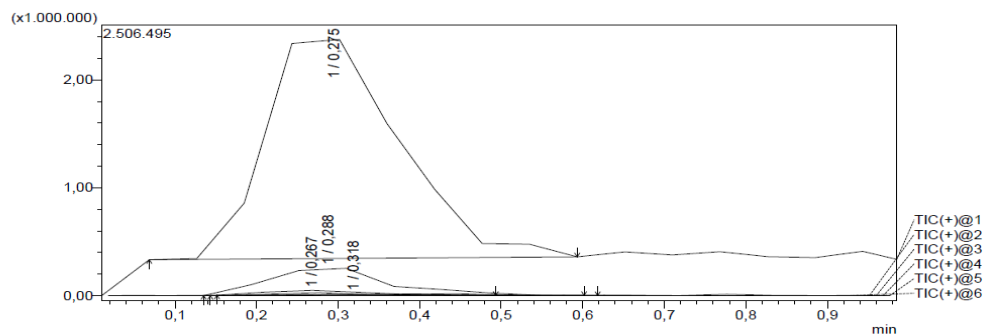

MS Spectrum  
LP-153 DD-LP-153-004.lcd  
UFMS +, 5 uL

Line#:1 R.Time:----(Scan#:----)  
MassPeaks:8  
Spectrum Mode:Averaged 0,185-0,302(19-31) Base Peak:502,3(356029)  
BG Mode:Averaged 0,010-0,068(1-7) Segment 1 - Event 1

Positive1ESI+Q3 Scan

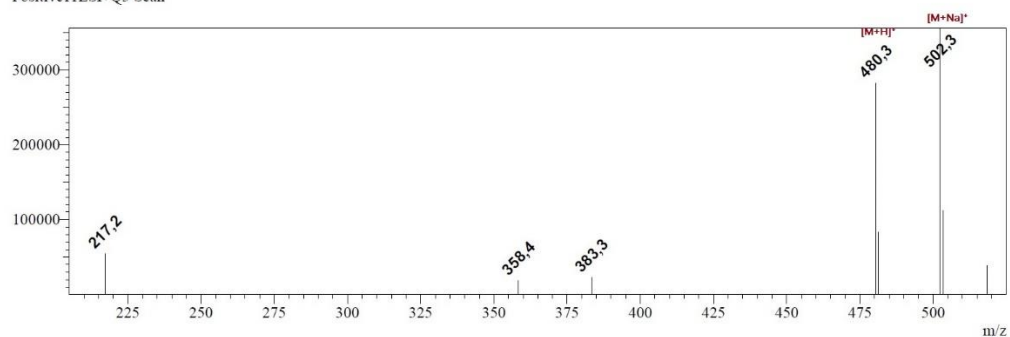

Fig. S9: ESI-MS of *Cyclo*-[NHMeAla-Anth-NMeAla-Anth Ala-OH] (Versicotide A)



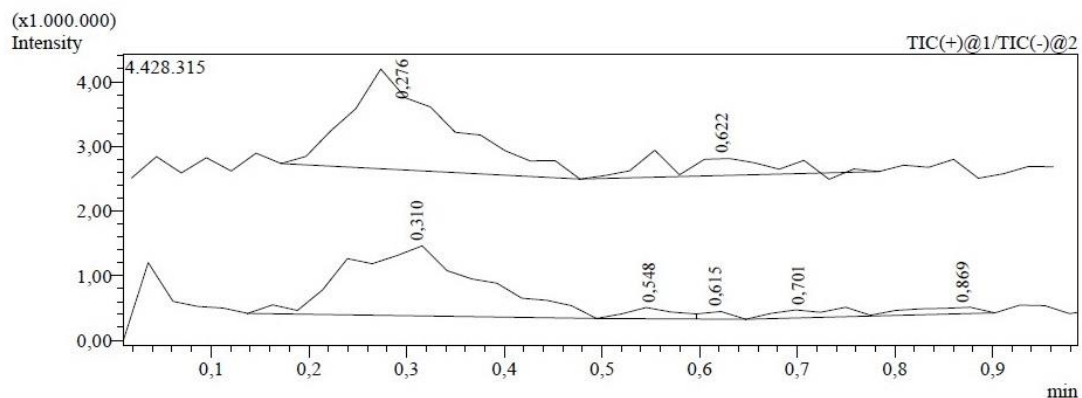

Line#1 R.Time:----(Scan#:) MassPeaks:25 BasePeak:498(139136)  
 Spectrum Mode:Averaged 0.214-0.316(17-25)  
 BG Mode:Averaged 0.036-0.138(3-11) Segment 1 - Event 1

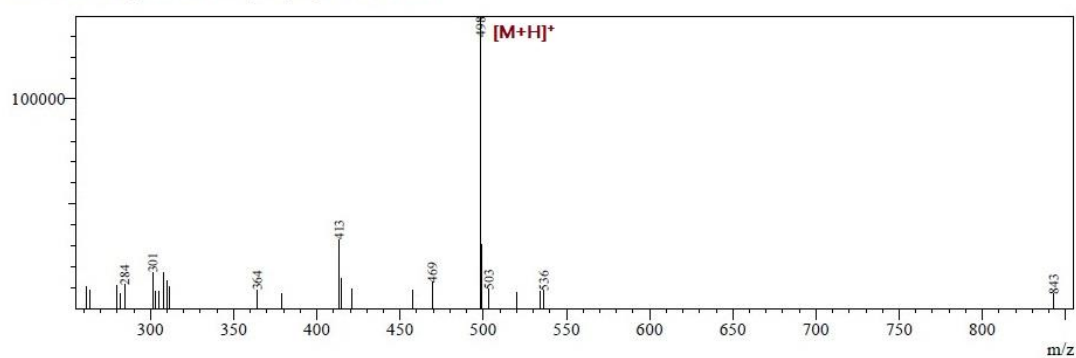

ESPECTRO MS+

Line#1 R.Time:----(Scan#:----)  
 MassPeaks:22  
 Spectrum Mode:Averaged 0.240-0.342(19-27) Base Peak:498(151930)  
 BG Mode:Averaged 0.010-0.112(1-9) Segment 1 - Event 1

| #  | m/z    | Absolute Intensity | Relative Intensity |
|----|--------|--------------------|--------------------|
| 1  | 261,25 | 11346              | 7,47               |
| 2  | 263,10 | 7943               | 5,23               |
| 3  | 279,05 | 10106              | 6,65               |
| 4  | 280,15 | 12216              | 8,04               |
| 5  | 284,45 | 16956              | 11,16              |
| 6  | 301,25 | 22178              | 14,60              |
| 7  | 308,25 | 16084              | 10,59              |
| 8  | 310,00 | 12314              | 8,11               |
| 9  | 311,10 | 9991               | 6,58               |
| 10 | 364,10 | 12879              | 8,48               |
| 11 | 365,35 | 8324               | 5,48               |
| 12 | 413,30 | 38829              | 25,56              |
| 13 | 414,35 | 14589              | 9,60               |
| 14 | 421,30 | 9678               | 6,37               |
| 15 | 457,30 | 8909               | 5,86               |
| 16 | 469,25 | 12541              | 8,25               |
| 17 | 498,35 | 151930             | 100,00             |
| 18 | 499,30 | 30816              | 20,28              |
| 19 | 503,30 | 9246               | 6,09               |
| 20 | 534,30 | 9488               | 6,24               |

Fig. S10: ESI MS of NHMeAla-Anth-Ala-Anth-NMeAla-OH (Linear precursor of Versicotide B, 11)

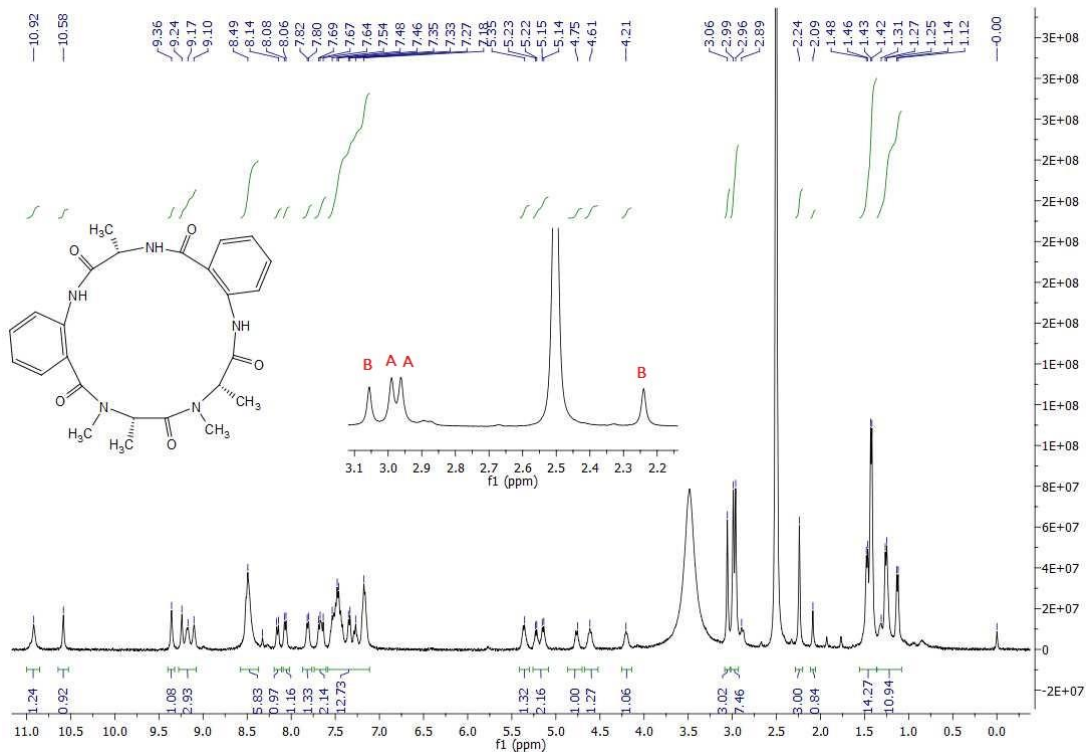

Fig. S11: <sup>1</sup>H-NMR in DMSO-d<sub>6</sub> of *Cyclo*-[NMeAla-Anth-Ala-Anth-NMeAla] (2) (Versicotide B).

Zoomed area: 2.20 – 3.15 ppm, A and B: conformers.

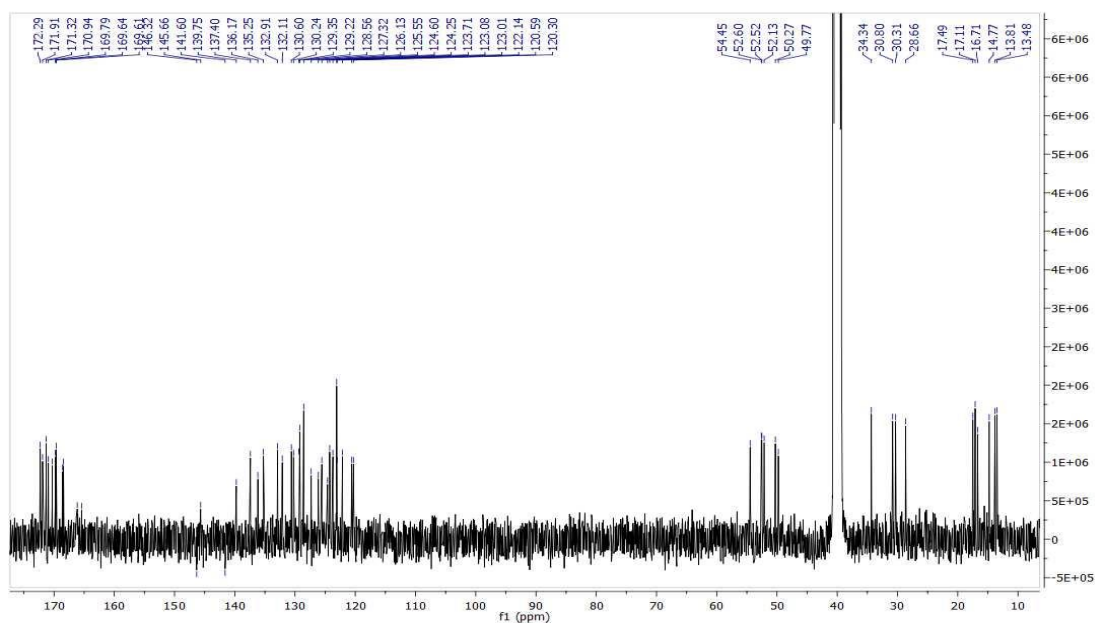

Fig. S12: <sup>13</sup>C-NMR in DMSO-d<sub>6</sub> of *Cyclo*-[NMeAla-Anth-Ala-Anth-NMeAla] (2) (Versicotide B)

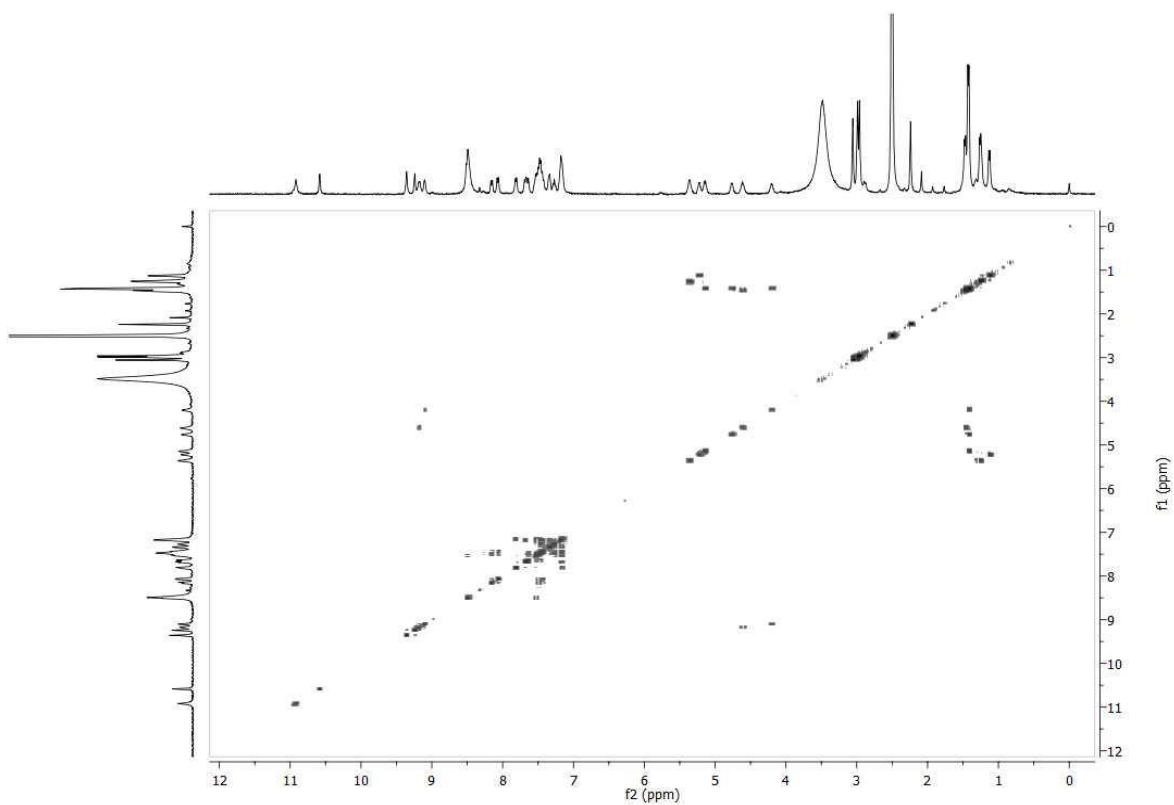

Fig. S13: COSY in DMSO-d6 of *Cyclo*-[NMeAla-Anth-Ala-Anth-NMeAla] (2)

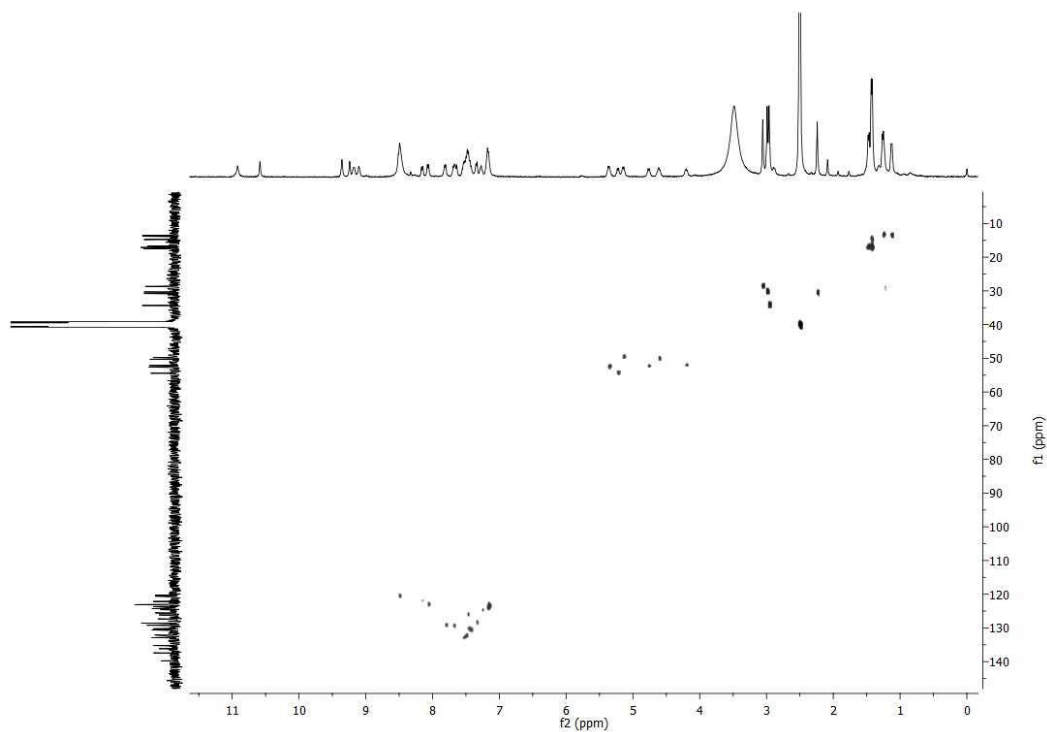

Fig. S14: HSQC in DMSO-d6 of *Cyclo*-[NMeAla-Anth-Ala-Anth-NMeAla] (2)

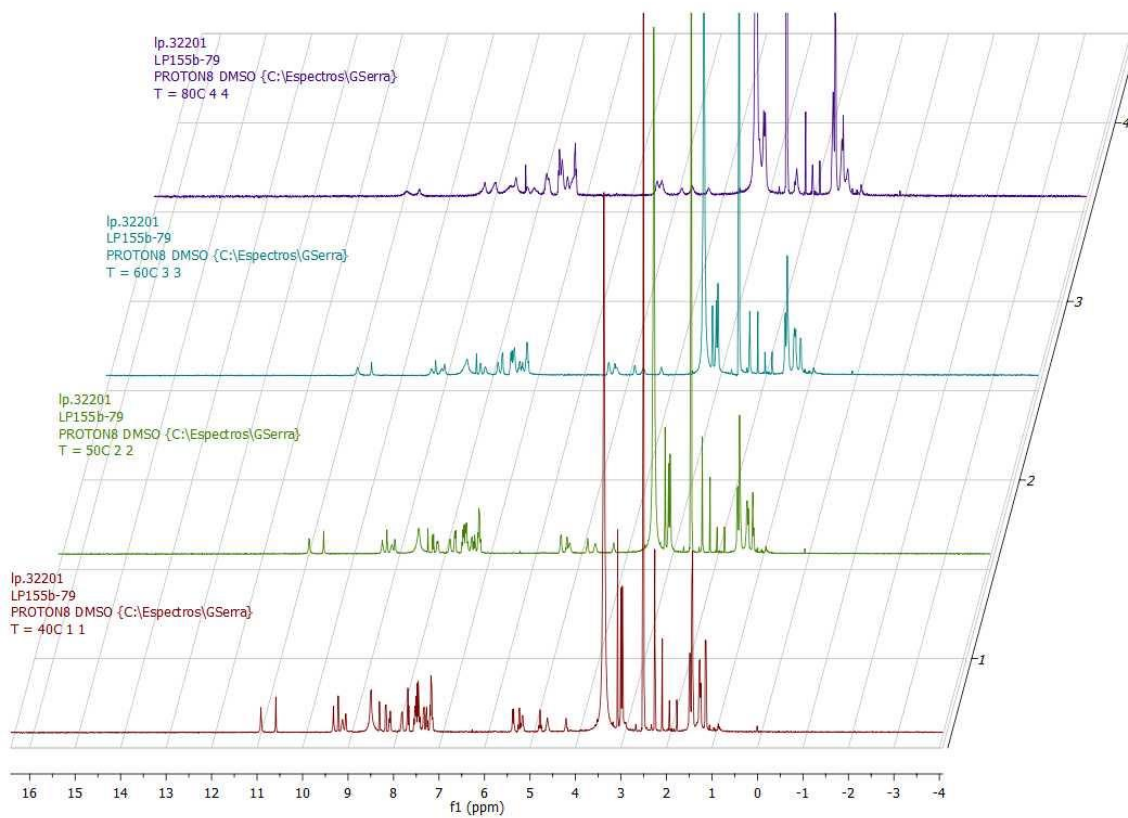

Fig. S15: Thermal gradient in DMSO-d<sub>6</sub> of *Cyclo*-[NMeAla-Anth-Ala-Anth-NMeAla] (2). Comparison of <sup>1</sup>H-NMR at 40 (red), 50 (green), 60 (blue) and 80°C (purple)

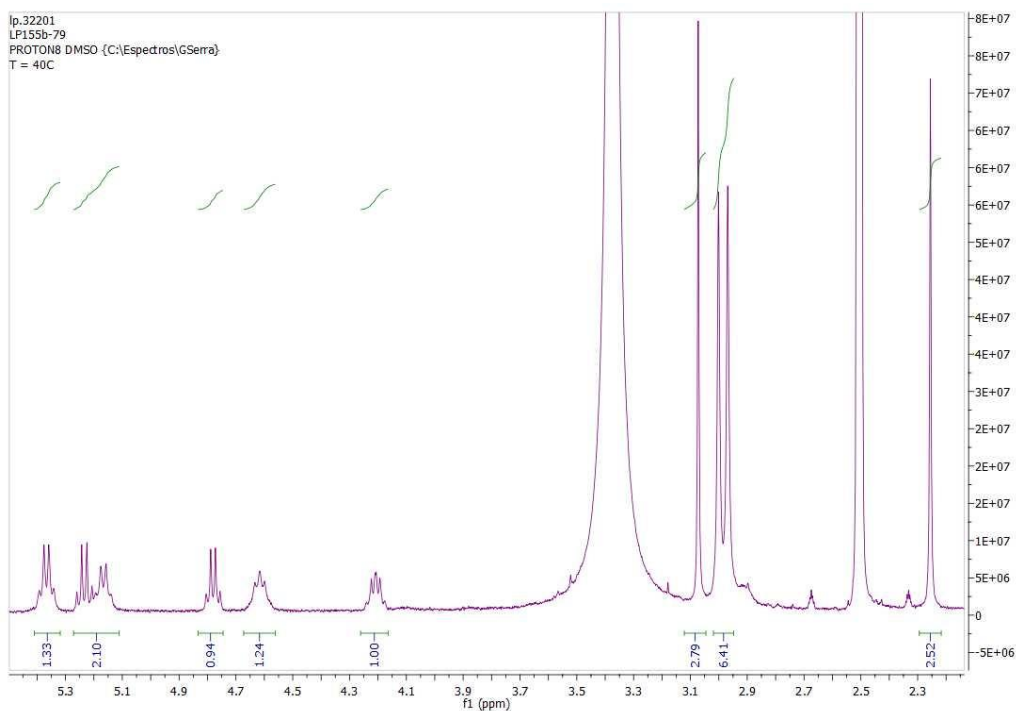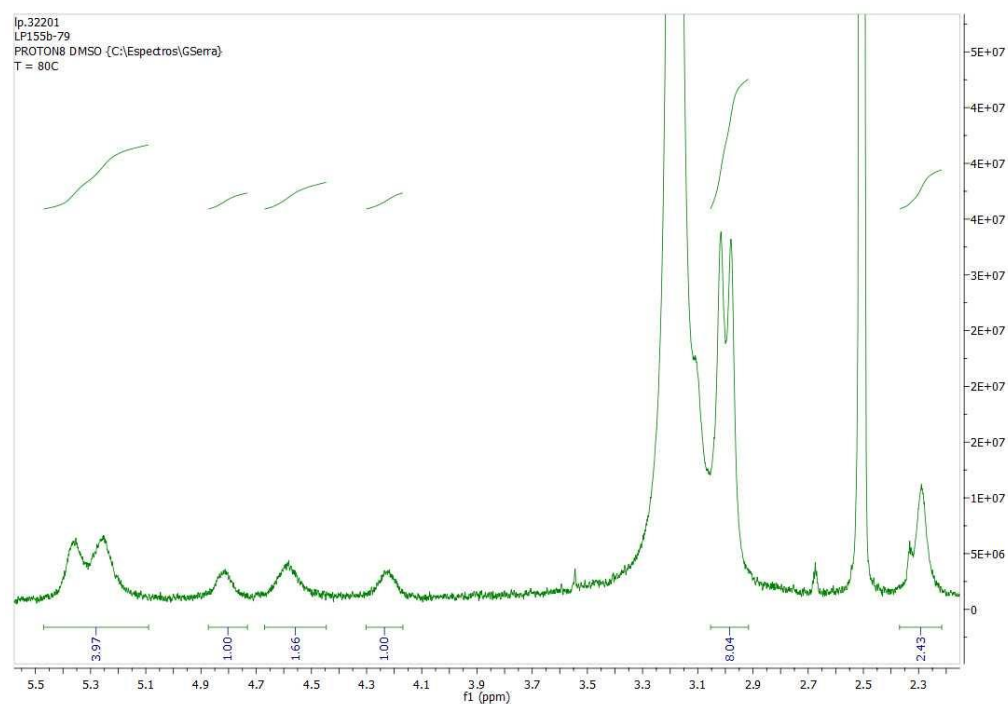

Fig. S16: Thermal gradient in DMSO-d<sub>6</sub> of *Cyclo*-[NMeAla-Anth-Ala-Anth-NMeAla] (2). Zoomed between 2.2 and 5.5 ppm. Comparison of <sup>1</sup>H-NMR at 40 (purple) and 80°C (green).

<Chromatogram>

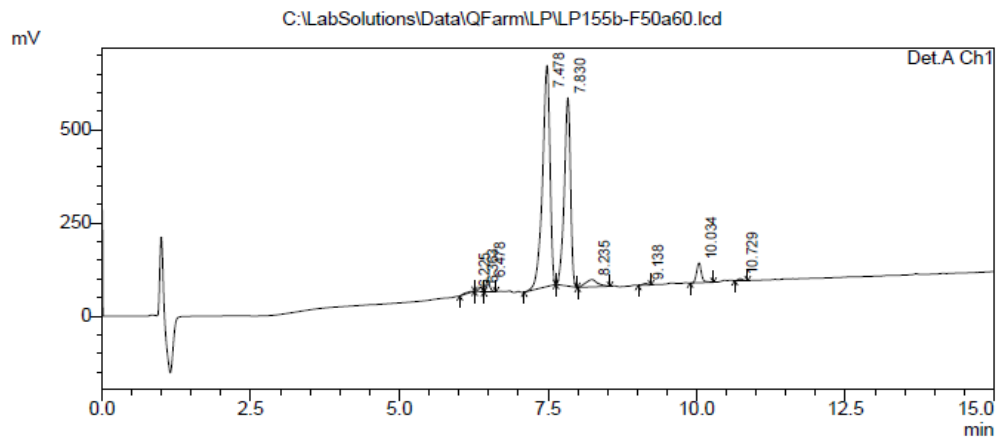

PeakTable

| Peak# | Ret. Time | Area    | Height  | Area %  | Height % |
|-------|-----------|---------|---------|---------|----------|
| 1     | 6.225     | 35626   | 2118    | 0.367   | 0.173    |
| 2     | 6.363     | 51899   | 12195   | 0.535   | 0.994    |
| 3     | 6.478     | 129447  | 30488   | 1.334   | 2.485    |
| 4     | 7.478     | 5171208 | 594011  | 53.293  | 48.418   |
| 5     | 7.830     | 3684549 | 505602  | 37.972  | 41.212   |
| 6     | 8.235     | 278530  | 20050   | 2.870   | 1.634    |
| 7     | 9.138     | 27061   | 4412    | 0.279   | 0.360    |
| 8     | 10.034    | 297509  | 52674   | 3.066   | 4.293    |
| 9     | 10.729    | 27579   | 5287    | 0.284   | 0.431    |
| Total |           | 9703407 | 1226837 | 100.000 | 100.000  |

Fig. S17: HPLC chromatogram of Cyclo-[NHMeAla-Anth-Ala-Anth-NMeAla] (2)

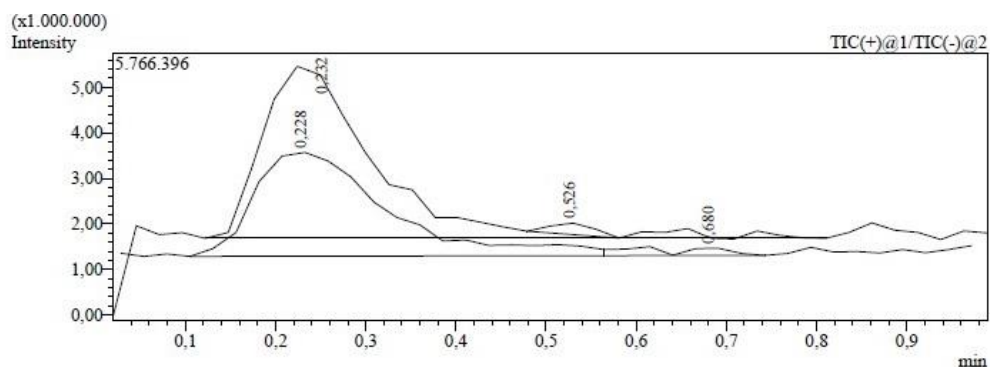

Line#1 R Time:----(Scan#) MassPeaks:26 BasePeak:102(302718)  
 Spectrum Mode:Averaged 0.173-0.250(13-19)  
 BG Mode:Averaged 0.581-0.709(45-55) Segment 1 - Event 1

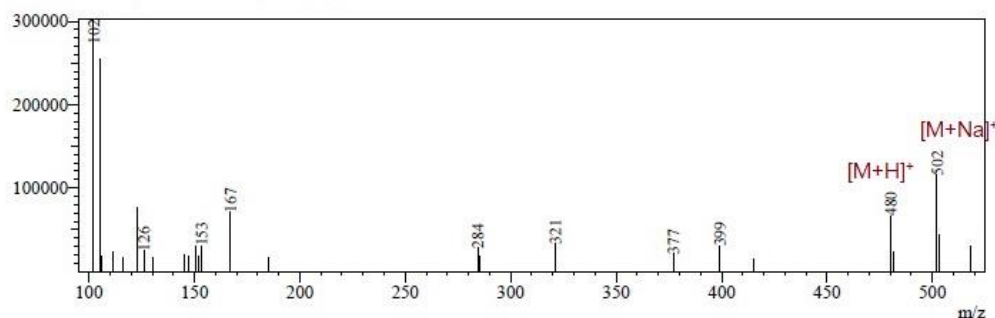

MS Spectrum

Line#1 R Time:----(Scan#)----  
 MassPeaks:26  
 Spectrum Mode:Averaged 0.173-0.250(13-19) Base Peak:102(302718)  
 BG Mode:Averaged 0.581-0.709(45-55) Segment 1 - Event 1

| #  | m/z    | Relative Inten: | Inten: |
|----|--------|-----------------|--------|
| 1  | 102.20 | 302718          | 100.00 |
| 2  | 105.10 | 254952          | 84.22  |
| 3  | 106.20 | 17592           | 5.81   |
| 4  | 111.20 | 23397           | 7.73   |
| 5  | 116.15 | 16683           | 5.51   |
| 6  | 122.60 | 76698           | 25.34  |
| 7  | 126.05 | 24624           | 8.13   |
| 8  | 130.25 | 16015           | 5.29   |
| 9  | 145.10 | 20279           | 6.70   |
| 10 | 147.15 | 18116           | 5.98   |
| 11 | 150.25 | 30020           | 9.92   |
| 12 | 152.00 | 18874           | 6.23   |
| 13 | 153.15 | 30139           | 9.96   |
| 14 | 167.05 | 70893           | 23.42  |
| 15 | 185.25 | 16414           | 5.42   |
| 16 | 284.35 | 27775           | 9.18   |
| 17 | 285.35 | 18358           | 6.06   |
| 18 | 321.15 | 33382           | 11.03  |
| 19 | 377.10 | 21086           | 6.97   |
| 20 | 399.10 | 30236           | 9.99   |
| 21 | 415.15 | 15412           | 5.09   |
| 22 | 480.25 | 66339           | 21.91  |
| 23 | 481.30 | 23233           | 7.67   |
| 24 | 502.20 | 115082          | 38.02  |

Fig. S18: ESI-MS of *Cyclo*-[NHMeAla-Anth-Ala-Anth-NMeAla] (2) Peak of  $t_r=7.48$  min

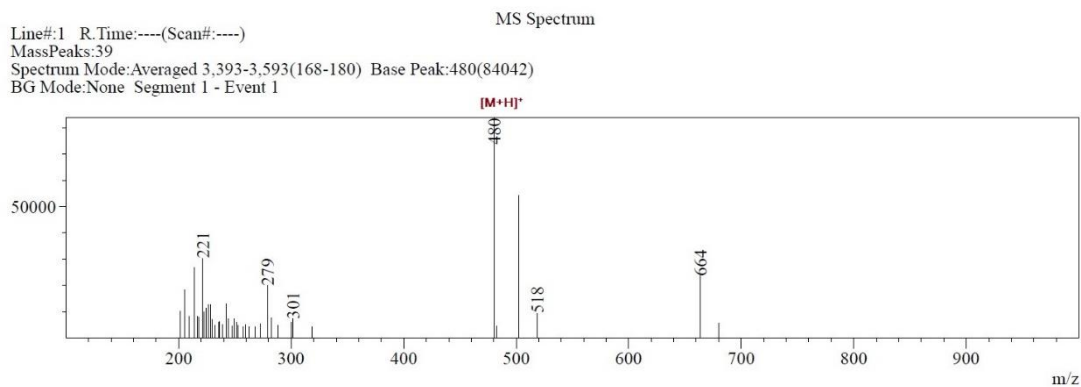

Line#:1 R.Time:----(Scan#:----)  
 MassPeaks:39  
 Spectrum Mode:Averaged 3,393-3,593(168-180) Base Peak:480(84042)  
 BG Mode:None Segment 1 - Event 1

| #  | m/z    | Relative Intensity | Intensive Intensity |
|----|--------|--------------------|---------------------|
| 1  | 201.35 | 10117              | 12.04               |
| 2  | 205.25 | 18213              | 21.67               |
| 3  | 209.40 | 8153               | 9.70                |
| 4  | 213.70 | 26895              | 32.00               |
| 5  | 216.60 | 8291               | 9.87                |
| 6  | 217.55 | 7902               | 9.40                |
| 7  | 221.35 | 30281              | 36.03               |
| 8  | 222.45 | 10009              | 11.91               |
| 9  | 224.45 | 11156              | 13.27               |
| 10 | 226.50 | 12706              | 15.12               |
| 11 | 228.20 | 12630              | 15.03               |
| 12 | 229.45 | 7130               | 8.48                |
| 13 | 232.35 | 4700               | 5.59                |
| 14 | 235.55 | 6052               | 7.20                |
| 15 | 236.65 | 6184               | 7.36                |
| 16 | 239.00 | 5237               | 6.23                |
| 17 | 242.60 | 12926              | 15.38               |
| 18 | 244.35 | 7443               | 8.86                |
| 19 | 247.60 | 4336               | 5.16                |
| 20 | 249.15 | 7479               | 8.90                |
| 21 | 251.35 | 5876               | 6.99                |
| 22 | 252.65 | 4656               | 5.54                |
| 23 | 257.45 | 4255               | 5.06                |
| 24 | 259.30 | 4944               | 5.88                |
| 25 | 262.45 | 4262               | 5.07                |
| 26 | 267.80 | 4222               | 5.02                |
| 27 | 272.30 | 5521               | 6.57                |
| 28 | 279.00 | 19966              | 23.76               |
| 29 | 282.60 | 7490               | 8.91                |
| 30 | 288.15 | 4912               | 5.84                |
| 31 | 300.00 | 5819               | 6.92                |
| 32 | 301.50 | 7368               | 8.77                |
| 33 | 318.35 | 4273               | 5.08                |
| 34 | 480.35 | 84042              | 100.00              |
| 35 | 482.55 | 4339               | 5.16                |
| 36 | 502.10 | 54334              | 64.65               |

Fig. S19: ESI-MS of *Cyclo*-[NHMeAla-Anth-Ala-Anth-NMeAla] (2) Peak of  $t_r=7.83$  min



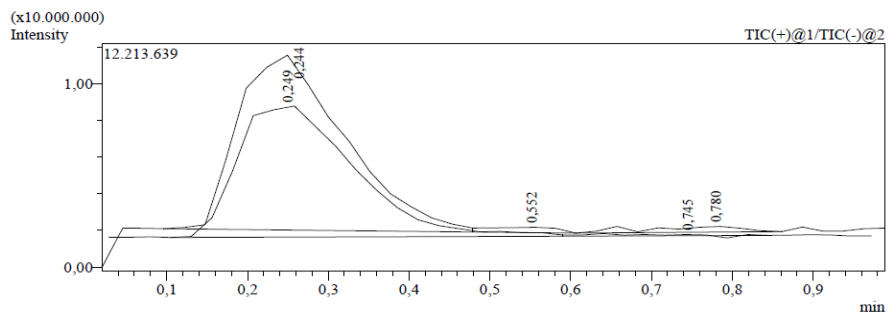

Line#:1 R Time:----(Scan#) MassPeaks:13 BasePeak:130(1492710)  
 Spectrum Mode:Averaged 0,173-0,275(13-21)  
 BG Mode:Averaged 0,658-0,760(51-59) Segment 1 - Event 1

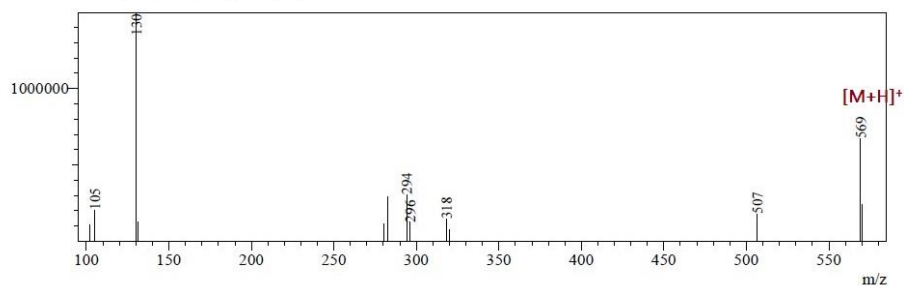

Fig. S20: ESI-MS of Ala-Anth-NMeAla-Ala-Anth-NMeAla (Linear precursor of Versicotide C, 12)

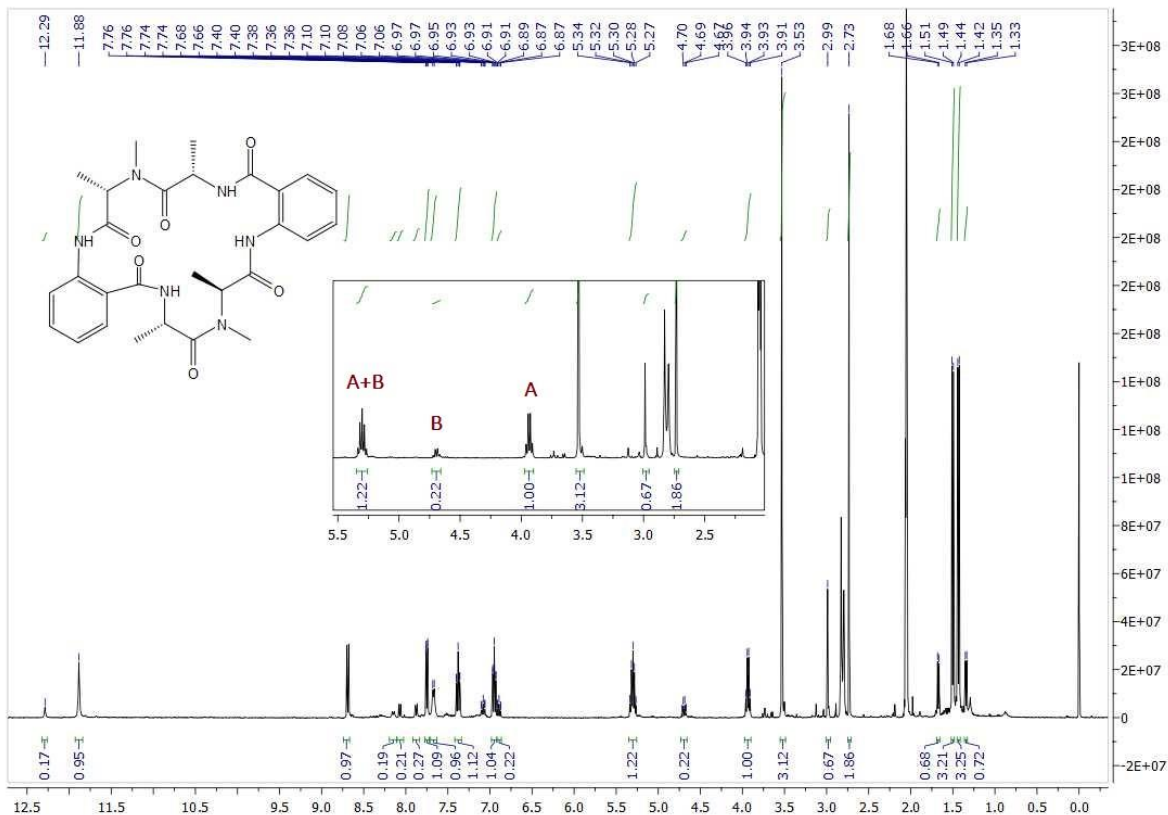

Fig. S21:  $^1\text{H-NMR}$  in  $(\text{CD}_3)_2\text{CO}$  of *Cyclo*-[NMeAla-Anth-Ala-NMeAla-Anth-Ala] (3)  
(Versicotide C). Zoomed area 2-5.5 ppm shows conformers.

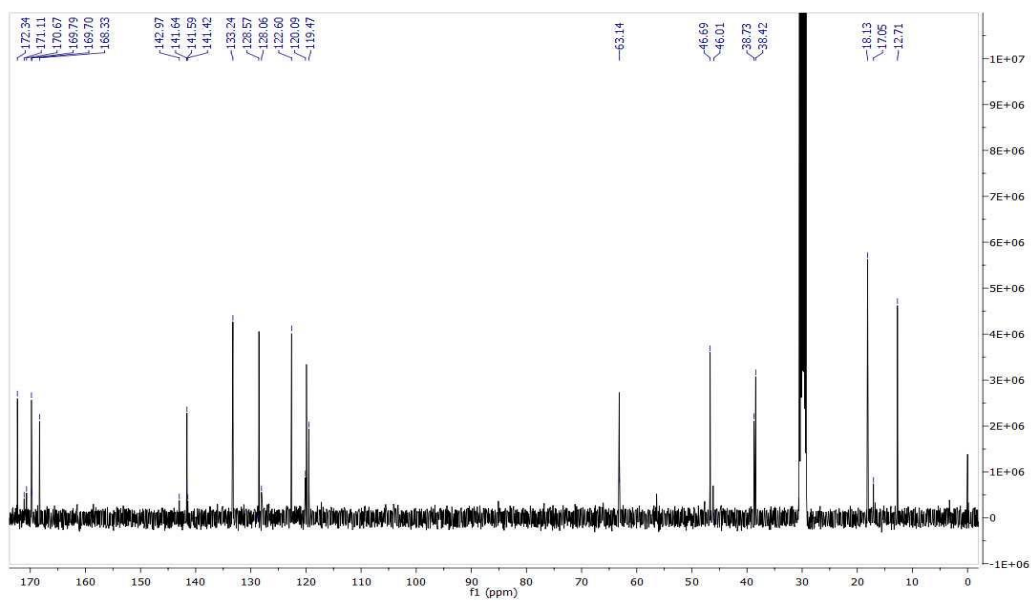

Fig. S22:  $^{13}\text{C-NMR}$  in  $(\text{CD}_3)_2\text{CO}$  of Versicotide C

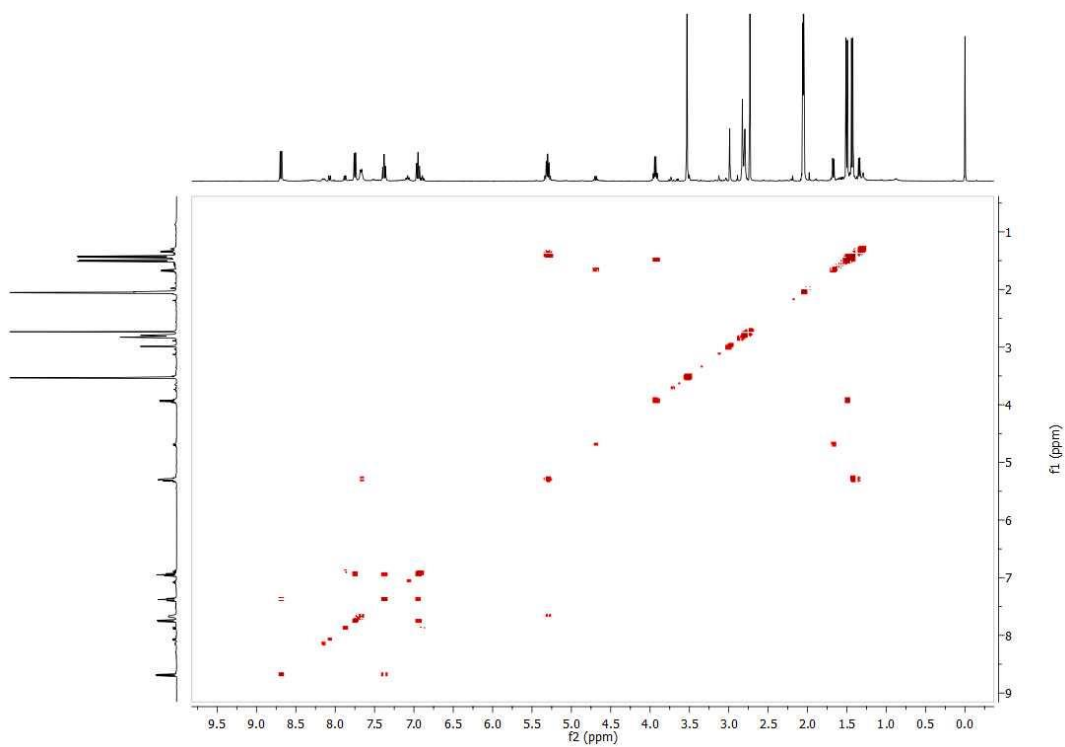

Fig. S23: COSY in  $(\text{CD}_3)_2\text{CO}$  of Versicotide C

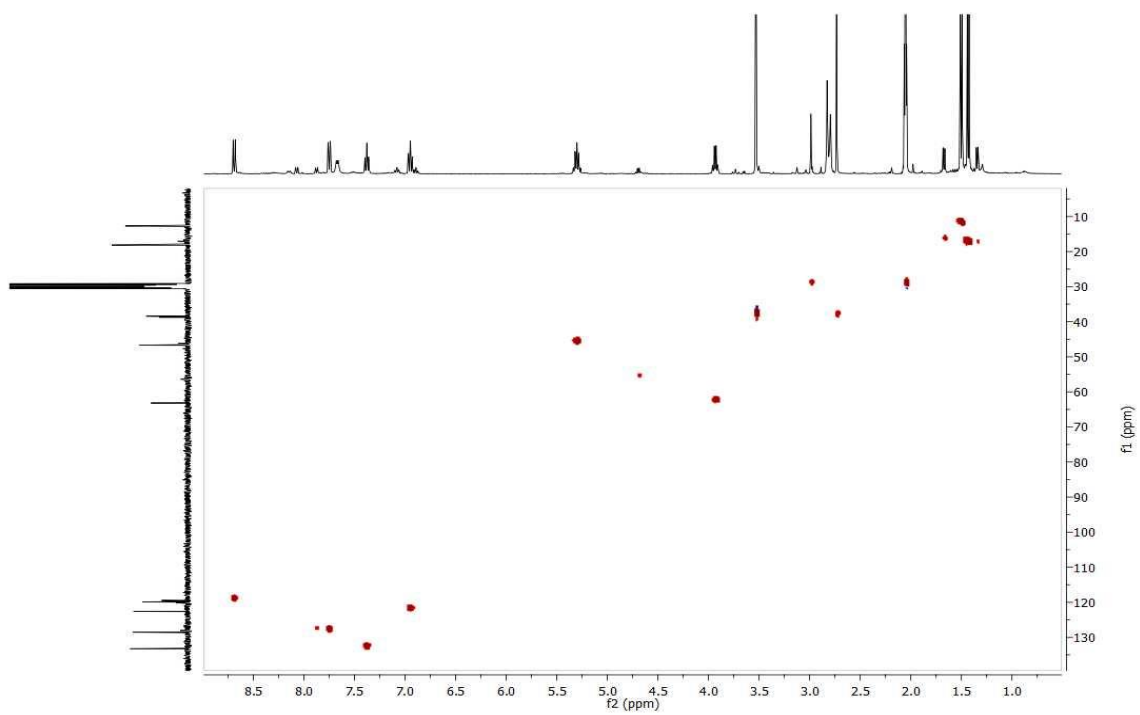

Fig. S24: HSQC in  $(\text{CD}_3)_2\text{CO}$  of Versicotide C

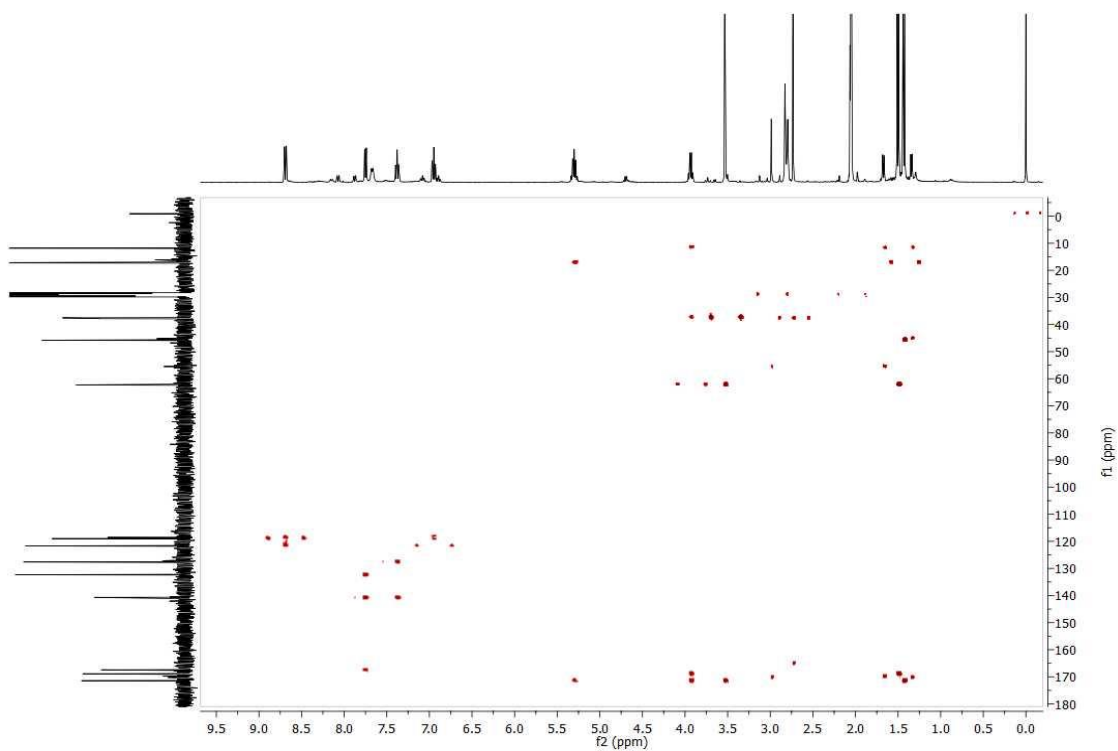

Fig. S25: HMBC in  $(\text{CD}_3)_2\text{CO}$  of Versicotide C

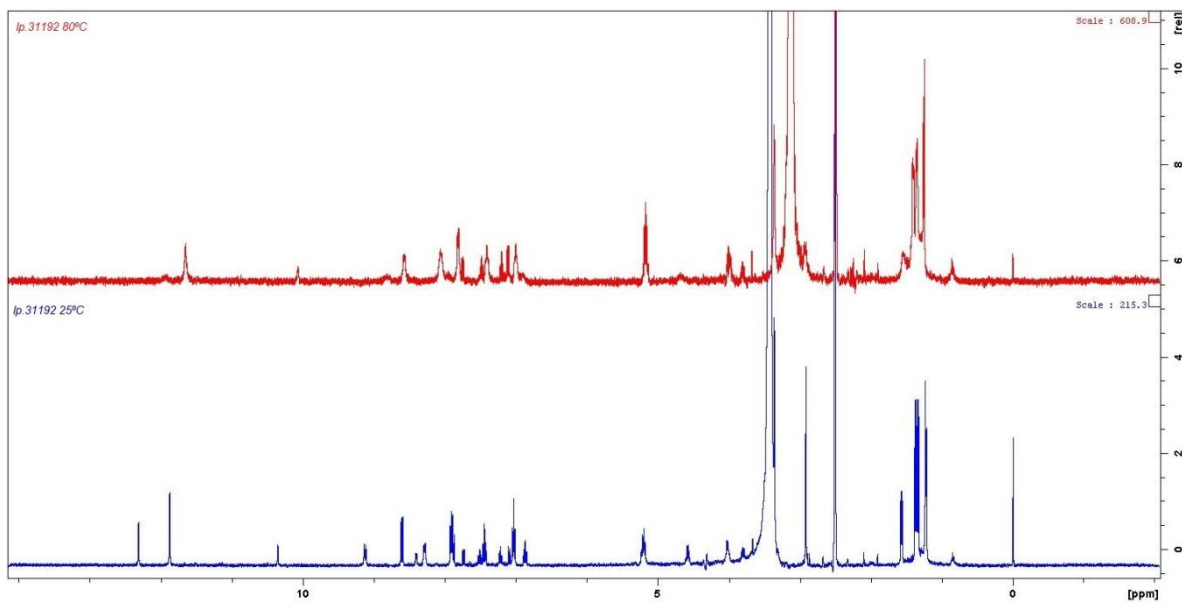

Fig. S26: Comparison of <sup>1</sup>H-NMR of Versicotide C at 25°C (blue) and 80°C (red)

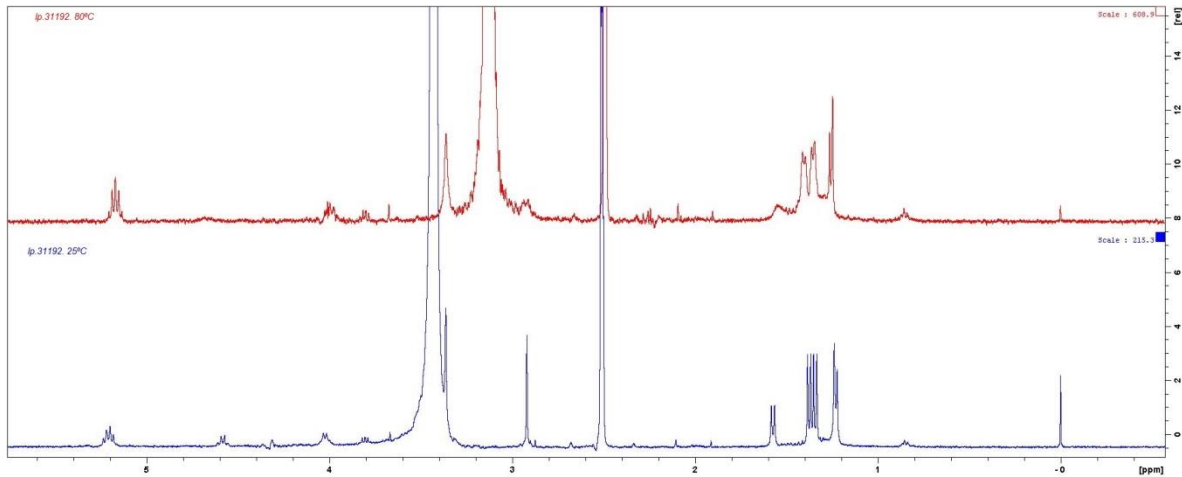

Fig. S27: Comparison of <sup>1</sup>H-NMR of Versicotide C at 25°C (blue) and 80°C (red)

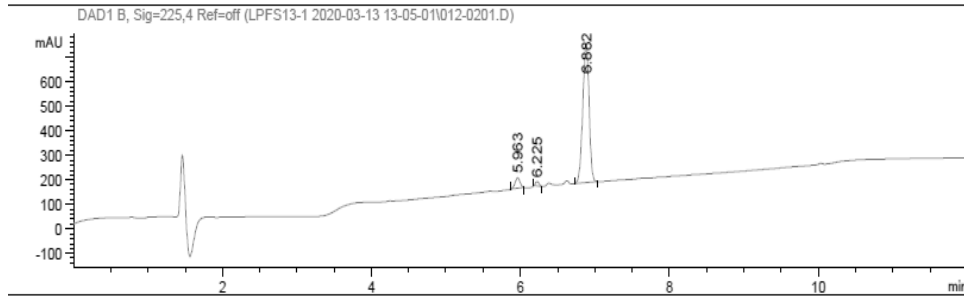

Signal 2: DAD1 B, Sig=225,4 Ref=off

| RetTime<br>[min] | k'   | Area<br>[mAU*s] | Height<br>[mAU] | Symm. | Width<br>[min] | Plates | Resol | Select |
|------------------|------|-----------------|-----------------|-------|----------------|--------|-------|--------|
|                  |      |                 |                 |       |                | tion   | ivity |        |
| 5.963            | 2.99 | 194.34052       | 43.00684        | 1.04  | 0.0733         | 36608  | -     | -      |
| 6.225            | 3.16 | 56.87580        | 18.06624        | 0.89  | 0.0547         | 71904  | 2.41  | 1.06   |
| 6.882            | 3.60 | 3327.74341      | 565.47705       | 1.10  | 0.0933         | 30114  | 5.22  | 1.14   |

Fig. S28: HPLC chromatogram of *Cyclo*-[Ala-Anth-NMeAla-Ala-Anth-NMeAla] (1)(Versicotide

C)

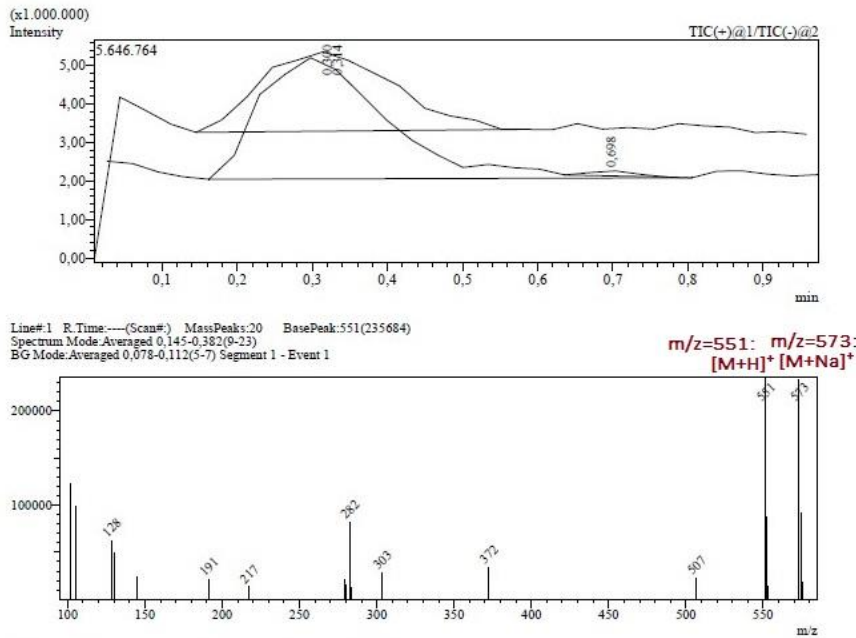

## MS Spectrum

Line#:1 R.Time:----(Scan#:----)  
MassPeaks:20  
Spectrum Mode:Averaged 0.145-0.382(9-23) Base Peak:551(235684)  
BG Mode:Averaged 0.078-0.112(5-7) Segment 1 - Event 1

| #  | m/z    | solute | Inten  | relative | Inten: |
|----|--------|--------|--------|----------|--------|
| 1  | 102.20 | 122700 | 52.06  |          |        |
| 2  | 105.15 | 99169  | 42.08  |          |        |
| 3  | 128.10 | 62540  | 26.54  |          |        |
| 4  | 130.10 | 49255  | 20.90  |          |        |
| 5  | 145.00 | 23496  | 9.97   |          |        |
| 6  | 191.10 | 21056  | 8.93   |          |        |
| 7  | 217.15 | 13160  | 5.58   |          |        |
| 8  | 279.15 | 21156  | 8.98   |          |        |
| 9  | 280.25 | 15371  | 6.52   |          |        |
| 10 | 282.30 | 81902  | 34.75  |          |        |
| 11 | 283.30 | 11958  | 5.07   |          |        |
| 12 | 303.10 | 27816  | 11.80  |          |        |
| 13 | 372.15 | 34352  | 14.58  |          |        |
| 14 | 506.60 | 22514  | 9.55   |          |        |
| 15 | 551.30 | 235684 | 100.00 |          |        |
| 16 | 552.30 | 87161  | 36.98  |          |        |
| 17 | 553.35 | 14547  | 6.17   |          |        |
| 18 | 573.25 | 233749 | 99.18  |          |        |

Fig. S29: ESI-MS of *Cyclo*-[Ala-Anth-NMeAla-Ala-Anth-NMeAla] (4)  
(Versicotide C)

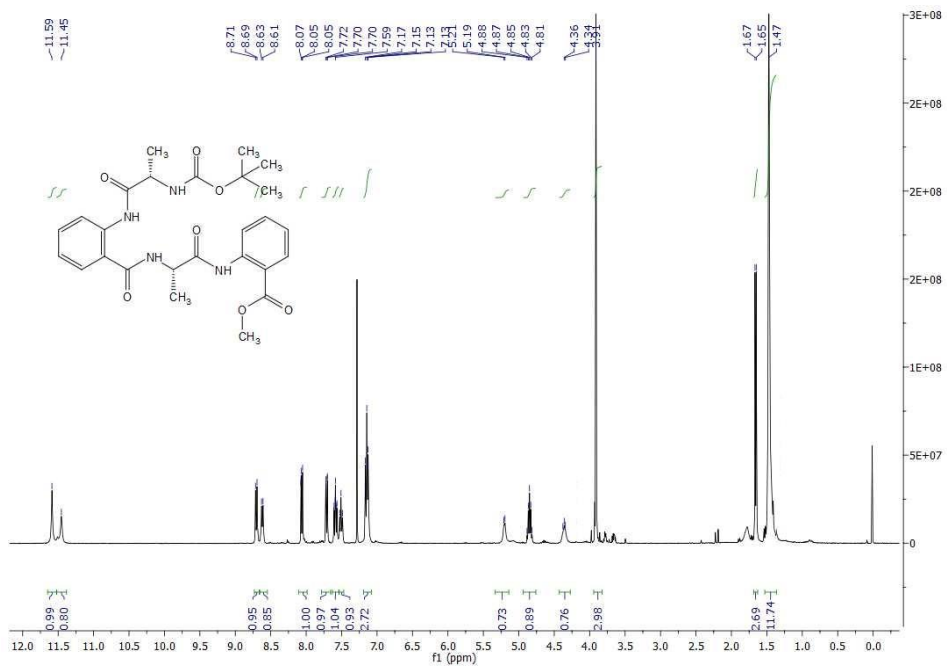

Fig. S30: <sup>1</sup>H-NMR in CDCl<sub>3</sub> of BocNHAla-Anth-Ala-AnthOMe (6)

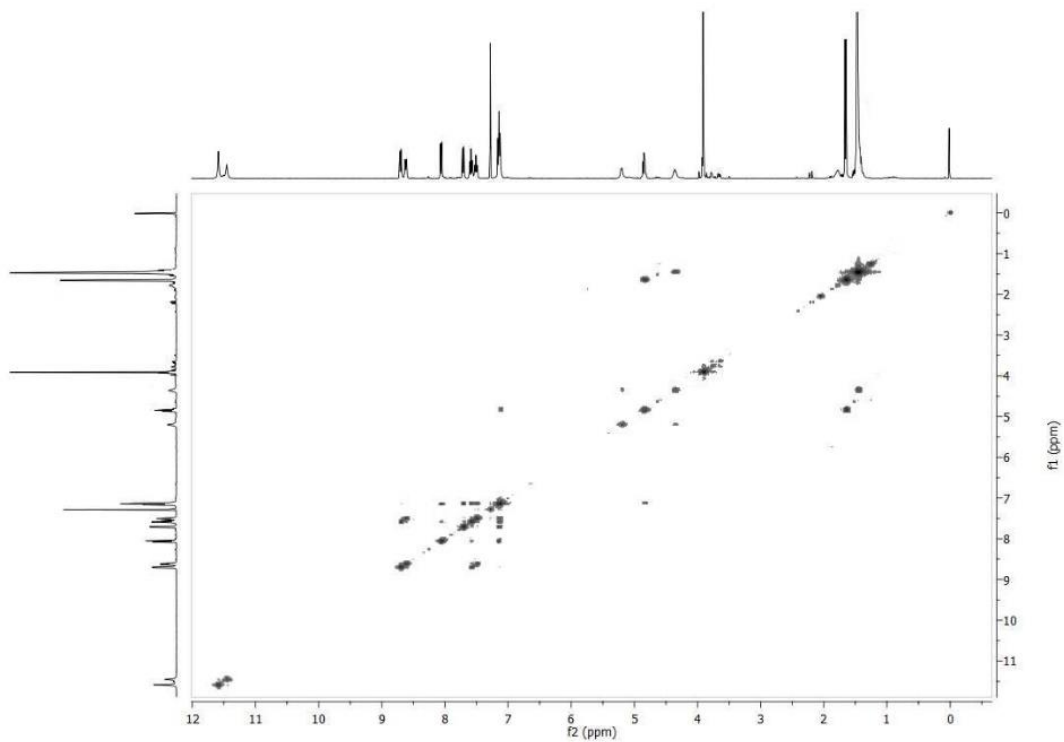

Fig. S31: COSY in CDCl<sub>3</sub> of BocNHAla-Anth-Ala-AnthOMe (6)

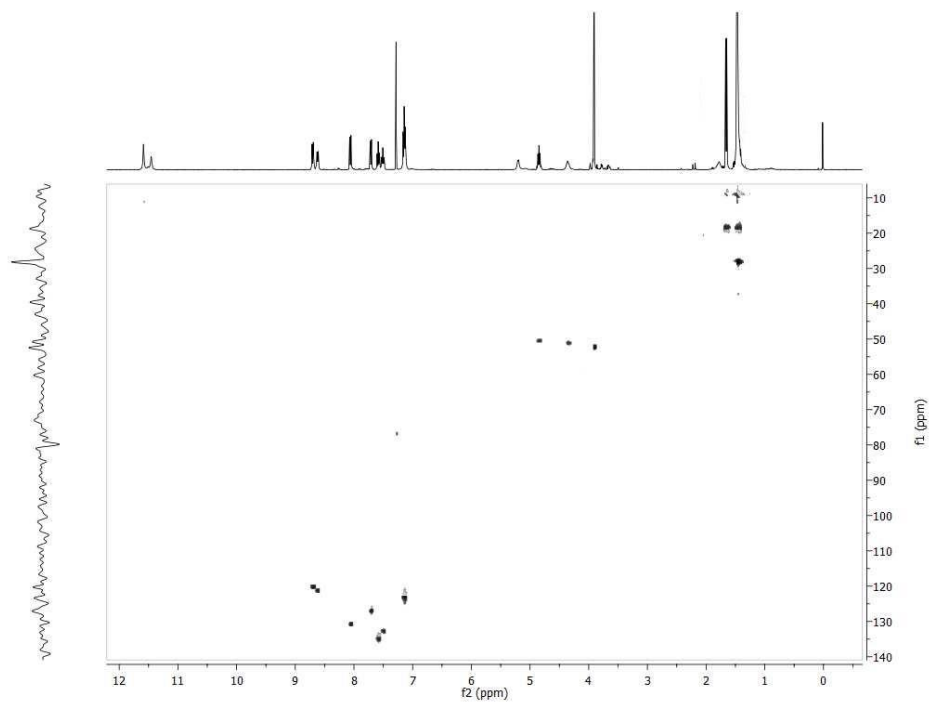

Fig. S32: HSQC in  $\text{CDCl}_3$  of BocNHAla-Anth-Ala-AnthOMe (6)

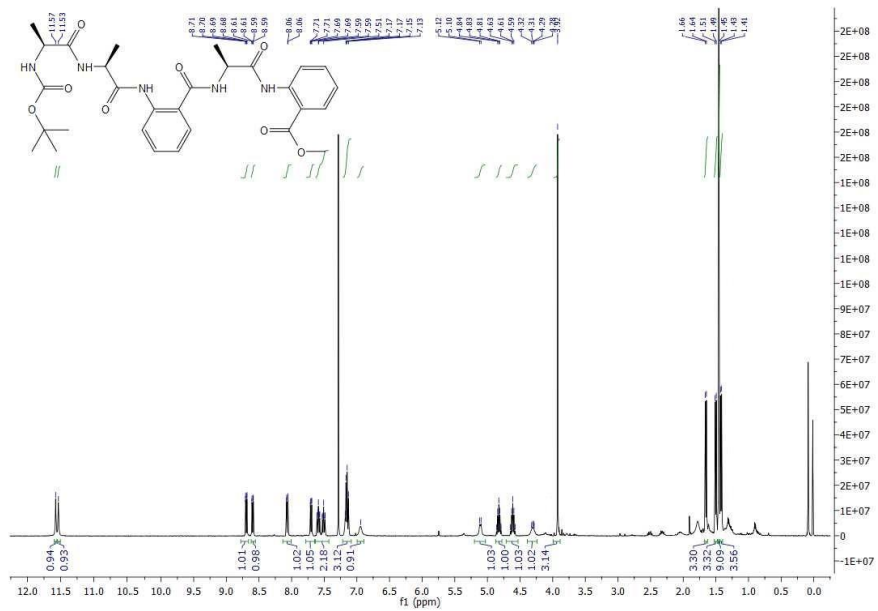

Fig. S33:  $^1\text{H}$ -NMR in  $\text{CDCl}_3$  of BocNHAla-Ala-Anth-Ala-AnthOMe (7)



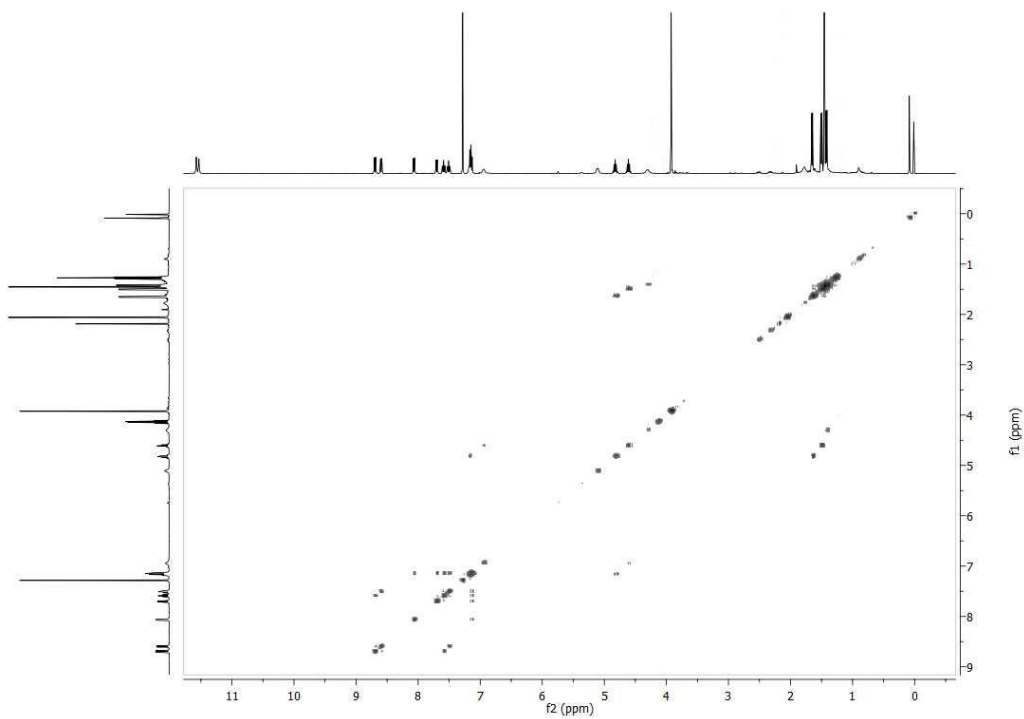

Fig. S34: COSY in  $\text{CDCl}_3$  of BocNHAla-Ala-Anth-Ala-AnthOMe (7)

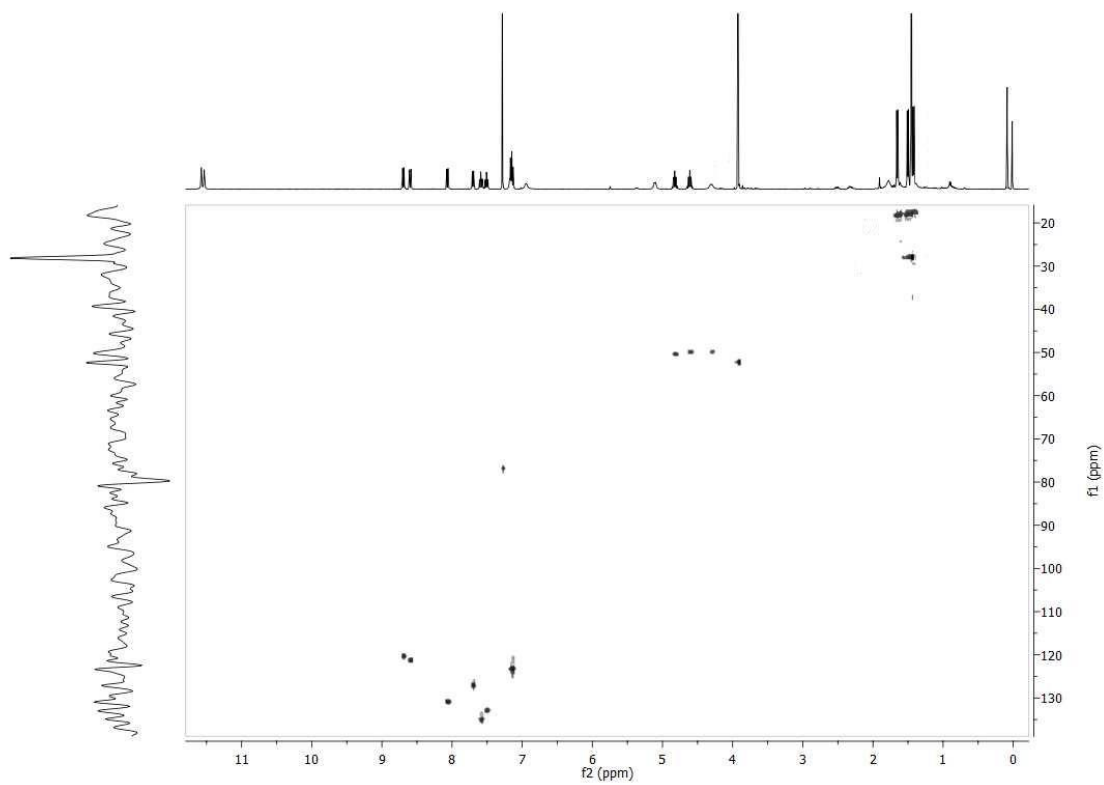

Fig. S35: HSQC in  $\text{CDCl}_3$  of BocNHAla-Ala-Anth-Ala-AnthOMe (7)

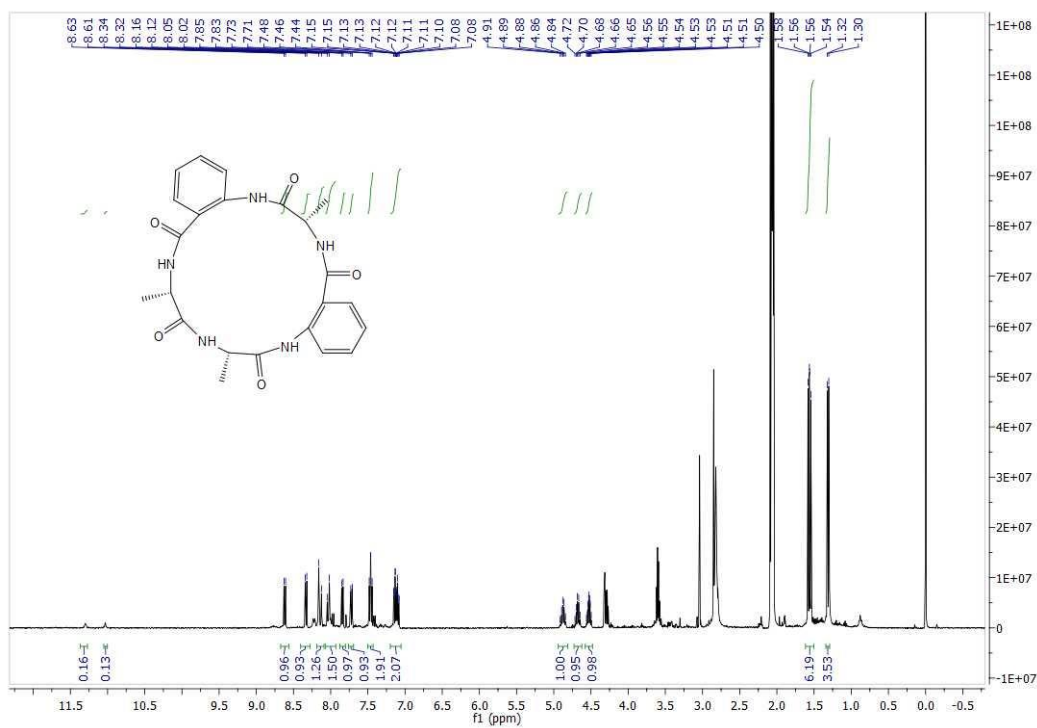

Fig. S36: <sup>1</sup>H-NMR in (CD<sub>3</sub>)<sub>2</sub>CO of *Cyclo*-[Ala-Ala-Anth-Ala-Anth] (4)

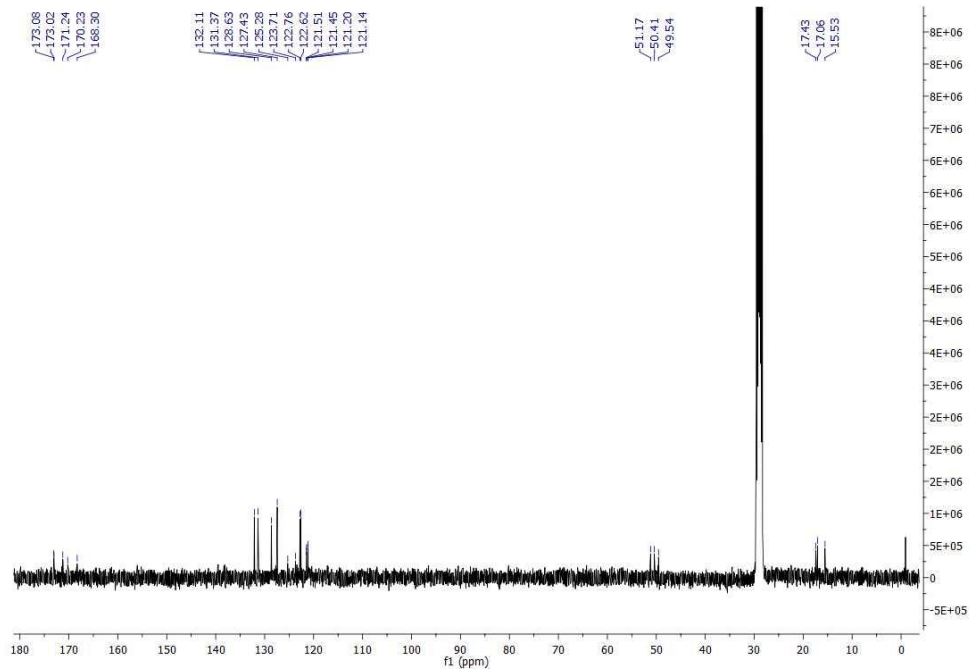

Fig. S37:  $^{13}\text{C}$ -NMR in  $(\text{CD}_3)_2\text{CO}$  of *Cyclo*-[Ala-Ala-Anth-Ala-Anth] (6)

<Chromatogram>

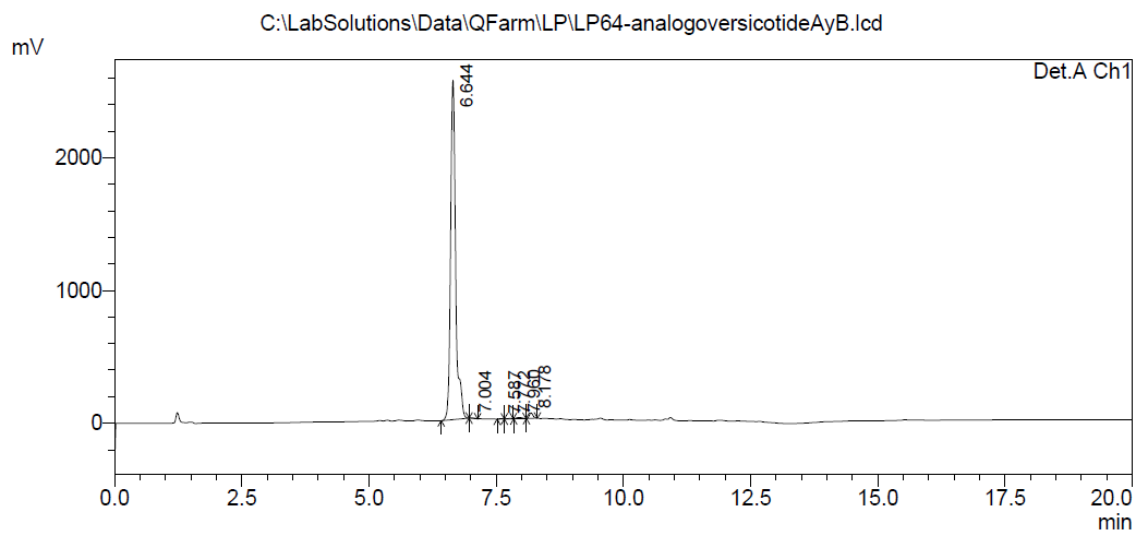

PeakTable

Detector A Ch1 220nm

| Peak# | Ret. Time | Area     | Height  | Area %  | Height % |
|-------|-----------|----------|---------|---------|----------|
| 1     | 6.644     | 17623262 | 2559012 | 98.213  | 97.750   |
| 2     | 7.004     | 18446    | 2648    | 0.103   | 0.101    |
| 3     | 7.587     | 16018    | 3991    | 0.089   | 0.152    |
| 4     | 7.772     | 19829    | 3746    | 0.111   | 0.143    |
| 5     | 7.960     | 67182    | 8406    | 0.374   | 0.321    |
| 6     | 8.178     | 199105   | 40116   | 1.110   | 1.532    |
| Total |           | 17943841 | 2617919 | 100.000 | 100.000  |

Fig. S38: Chromatogram *Cyclo*-[Ala-Ala-Anth-Ala-Anth](4)

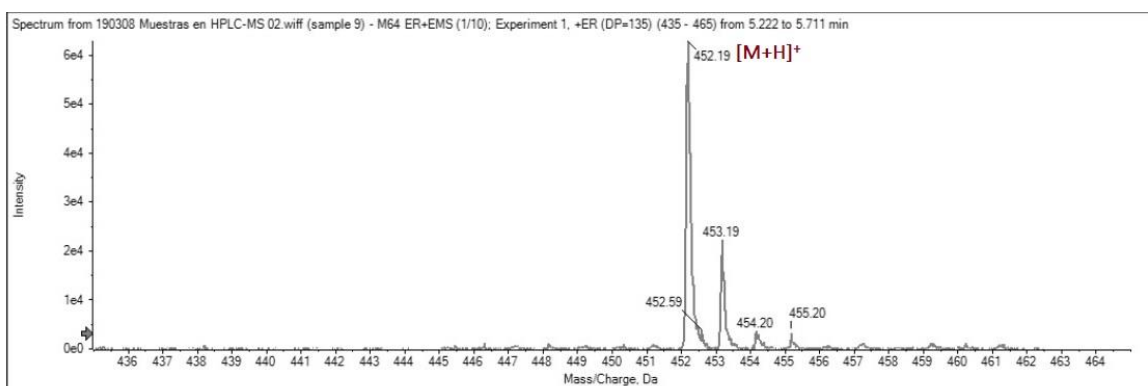

Fig. S39: ESI-MS of *Cyclo*-[Ala-Ala-Anth-Ala-Anth]

X ray crystallographic data

CDCC reference number of *Cyclo*-[NHMeAla-Anth-NMeAla-Anth Ala-OH] (Versicotide A):

2023773

## checkCIF/PLATON report

Structure factors have been supplied for datablock(s) cu\_200311\_aplp\_lp153\_0m\_a

THIS REPORT IS FOR GUIDANCE ONLY. IF USED AS PART OF A REVIEW PROCEDURE FOR PUBLICATION, IT SHOULD NOT REPLACE THE EXPERTISE OF AN EXPERIENCED CRYSTALLOGRAPHIC REFEREE.

No syntax errors found. CIF dictionary Interpreting this report

### Datablock: cu\_200311\_aplp\_lp153\_0m\_a

---

Bond precision: C-C = 0.0048 A Wavelength=1.54178  
Cell: a=9.9455(3) b=8.2022(3) c=15.9136(6)  
alpha=90 beta=93.461(2) gamma=90  
Temperature: 298 K

|                | Calculated            | Reported              |
|----------------|-----------------------|-----------------------|
| Volume         | 1295.78(8)            | 1295.78(8)            |
| Space group    | P 21                  | P 1 21 1              |
| Hall group     | P 2yb                 | P 2yb                 |
| Moiety formula | C25 H29 N5 O5, C H4 O | C25 H29 N5 O5, C H4 O |
| Sum formula    | C26 H33 N5 O6         | C26 H33 N5 O6         |
| Mr             | 511.57                | 511.57                |
| Dx,g cm-3      | 1.311                 | 1.311                 |
| Z              | 2                     | 2                     |
| Mu (mm-1)      | 0.779                 | 0.779                 |
| F000           | 544.0                 | 544.0                 |
| F000'          | 545.74                |                       |
| h,k,lmax       | 12,10,19              | 12,10,19              |
| Nref           | 5249 [ 2817]          | 5186                  |
| Tmin,Tmax      | 0.773,0.853           | 0.479,0.754           |
| Tmin'          | 0.691                 |                       |

Correction method= # Reported T Limits: Tmin=0.479 Tmax=0.754  
AbsCorr = MULTI-SCAN

Data completeness= 1.84/0.99 Theta(max)= 73.877

R(reflections)= 0.0442( 4496) wR2(reflections)= 0.1210( 5186)

S = 1.059 Npar= 361

---

The following ALERTS were generated. Each ALERT has the format  
**test-name\_ALERT\_alert-type\_alert-level**.  
Click on the hyperlinks for more details of the test.

---

---

● **Alert level C**

|                   |                                         |         |             |
|-------------------|-----------------------------------------|---------|-------------|
| PLAT340_ALERT_3_C | Low Bond Precision on C-C Bonds .....   |         | 0.0048 Ang. |
| PLAT355_ALERT_3_C | Long O-H (X0.82,N0.98A) O6 - H33 .      |         | 1.06 Ang.   |
| PLAT410_ALERT_2_C | Short Intra H...H Contact H1 ..H23 .    |         | 1.95 Ang.   |
|                   |                                         | x,y,z = | 1_555 Check |
| PLAT414_ALERT_2_C | Short Intra D-H..H-X H5 ..H9            |         | 1.94 Ang.   |
|                   |                                         | x,y,z = | 1_555 Check |
| PLAT911_ALERT_3_C | Missing FCF Refl Between Thmin & STh/L= | 0.600   | 3 Report    |

---

● **Alert level G**

|                   |                                                  |       |          |
|-------------------|--------------------------------------------------|-------|----------|
| PLAT007_ALERT_5_G | Number of Unrefined Donor-H Atoms .....          |       | 1 Report |
| PLAT791_ALERT_4_G | Model has Chirality at C2 (Chiral SPGR)          |       | S Verify |
| PLAT791_ALERT_4_G | Model has Chirality at C12 (Chiral SPGR)         |       | S Verify |
| PLAT791_ALERT_4_G | Model has Chirality at C23 (Chiral SPGR)         |       | S Verify |
| PLAT912_ALERT_4_G | Missing # of FCF Reflections Above STh/L=        | 0.600 | 24 Note  |
| PLAT978_ALERT_2_G | Number C-C Bonds with Positive Residual Density. |       | 2 Info   |
| PLAT992_ALERT_5_G | Repd & Actual _reflns_number_gt Values Differ by |       | 1 Check  |

---

0 **ALERT level A** = Most likely a serious problem - resolve or explain  
0 **ALERT level B** = A potentially serious problem, consider carefully  
5 **ALERT level C** = Check. Ensure it is not caused by an omission or oversight  
7 **ALERT level G** = General information/check it is not something unexpected

0 ALERT type 1 CIF construction/syntax error, inconsistent or missing data  
3 ALERT type 2 Indicator that the structure model may be wrong or deficient  
3 ALERT type 3 Indicator that the structure quality may be low  
4 ALERT type 4 Improvement, methodology, query or suggestion  
2 ALERT type 5 Informative message, check

---

---

22 Y  
PLATON-Mar 30 23:15:46 2020 - (70316)  
Z -148 cu\_200311\_P 1 21 153\_0mR = 0.04

NOMOVE FORCED

Prob = 50  
Temp = 298

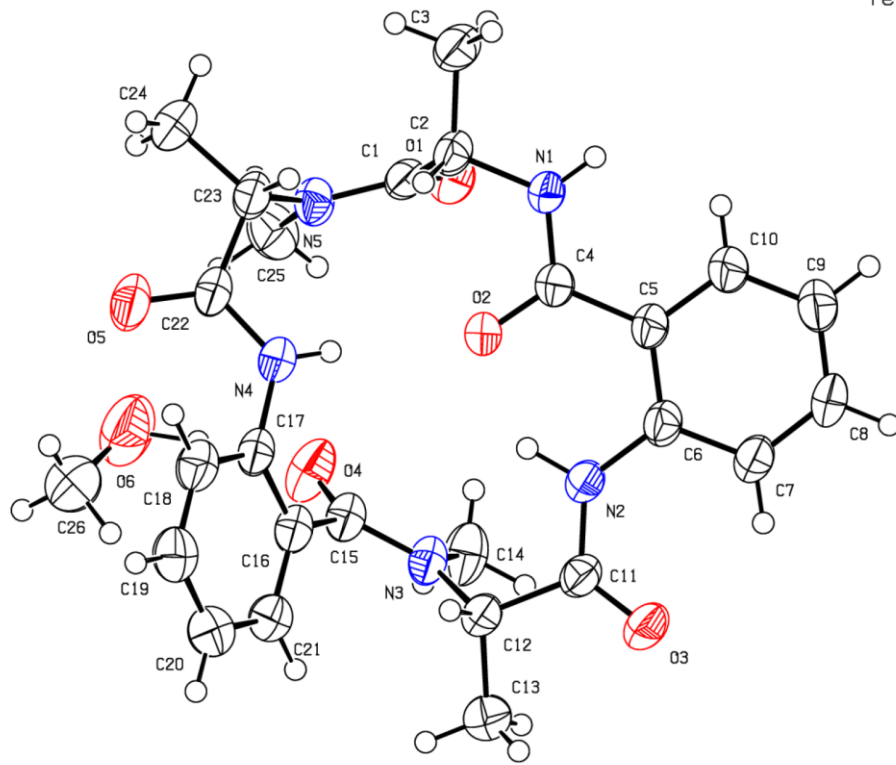

RES= 0 -129 X
